# Supplementary material for: The elucidation of phospholipid bilayer–small molecule interactions using a combination of phospholipid nanodiscs and solution state NMR techniques
Source: Royal Society of Chemistry journal article supplement (doi:10.1039/c9cc09948d), 2020-01-01
Supplement: c9cc09948d1.pdf [file c9cc09948d1.pdf]

# The elucidation of phospholipid bilayer-small molecule interactions using a combination of phospholipid nanodiscs and solution state NMR techniques

Georgina Townshend, Gary S. Thompson, Lisa J. White, Jennifer R. Hiscock\* and Jose L. Ortega-Roldan\*

## Contents

|                                                            |    |
|------------------------------------------------------------|----|
| <b>Experimental</b> .....                                  | 2  |
| <b>Chemical structures</b> .....                           | 3  |
| <b>Chemical Synthesis</b> .....                            | 3  |
| <b>Nanodisc synthesis and purification</b> .....           | 4  |
| <b>Nanodisc quantification</b> .....                       | 5  |
| <b>NMR methodology</b> .....                               | 5  |
| <b>DLS nanodisc characterisation data</b> .....            | 7  |
| <b>Zeta potential nanodisc characterisation data</b> ..... | 9  |
| <b>TEM nanodisc characterisation data</b> .....            | 10 |
| <b><sup>1</sup>H NMR SSA:Nanodisc data</b> .....           | 12 |
| <b><sup>1</sup>H NMR SSA:Nanodisc CPMG data</b> .....      | 18 |
| <b>References</b> .....                                    | 44 |

## Experimental

**General remarks:** A positive pressure of nitrogen and oven dried glassware were used for all reactions. All solvents and starting materials were purchased from known chemical suppliers or available stores and used without any further purification unless specifically stipulated. All phospholipid starting stocks were purchased from Avanti Polar Lipids. The NMR spectra were obtained using a Bruker AV2 400 MHz, Avance III 600 Hz spectrometer or AVNEO 400 MHz spectrometer. The data was processed using ACD Labs, MestReNova or Topspin software. NMR Chemical shift values are reported in parts per million (ppm) and calibrated to the centre of the residual solvent peak set, unless stated otherwise (s = singlet, br = broad, d = doublet, t = triplet, q = quartet, m = multiplet). Dynamic light scattering (DLS) and Zeta Potential studies were carried out using Anton Paar Litesizer™ 500 and processed using Kalliope™ Professional. TEM images were recorded on a Jeol 1230 TEM, operating at an accelerating voltage of 80 kV equipped with a Gatan One View 16 MP digital camera.

**DLS and Zeta Potential Studies:** All vials used for preparing the samples were clean and dry. All solvents used were filtered with 0.22 micron filters remove any particulates that may interfere with the results obtained. A series of 9 or 10 runs were recorded at 25 °C, allowing 10 mins for sample equilibration before the first measurement was recorded. These data were then averaged.

**Transmission Electron Microscopy (TEM) Imaging:** A droplet (2 µL) of sample was applied to formvar/carbon coated 600 mesh copper grids (Agar Scientific) and left for 5 minutes at RT. Excess liquid was aspirated from the grid and a drop of 2 % uranyl acetate (aqueous) was applied to the grid and immediately aspirated. Grids were then dried at room temperature.

## Chemical structures

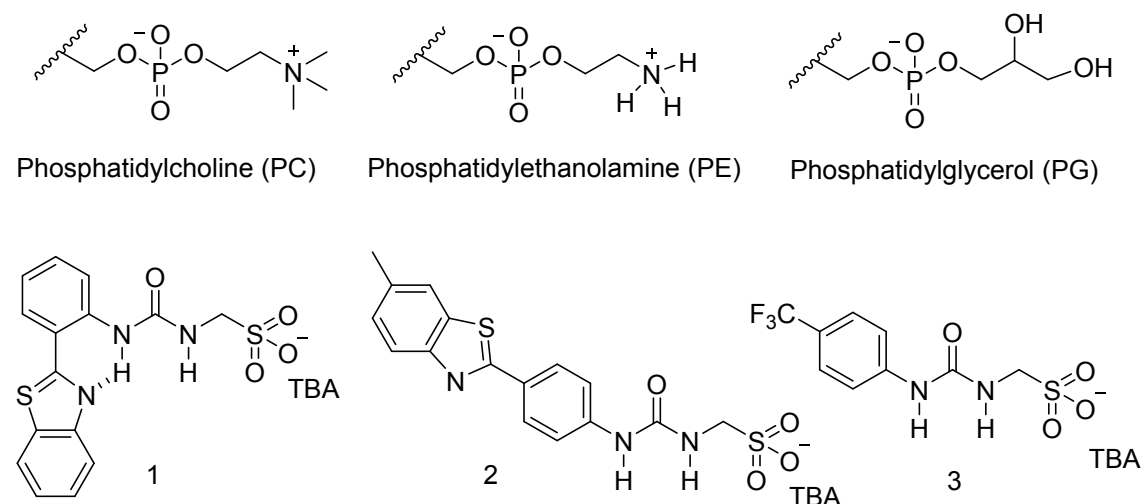

Figure S1 – Chemical structures of compounds **1-3**. TBA = Tetrabutylammonium.

## Chemical Synthesis

**Compound 1:** This compound was synthesised in line with our previously published methods. Proton NMR were found to match our previously published values.<sup>1</sup> <sup>1</sup>H NMR (400 MHz, 298 K, DMSO-*d*<sub>6</sub>): δ: 10.67 (s, 1H), 8.45 (d, *J* = 7.77 Hz, 1H), 8.30 (d, *J* = 7.79 Hz, 1H), 8.15 (d, *J* = 7.92 Hz, 1H), 7.85 (br s, *J* = 7.72 Hz, 2H), 7.58 (t, *J* = 7.58 Hz, 1H), 7.47 (tt, *J* = 11.69, 7.49 Hz, 2H), 7.10 (t, *J* = 7.52 Hz, 1H), 3.96 (s, 2H), 3.23 – 2.99 (m, 8H), 1.62 – 1.44 (m, 8H), 1.41 – 1.19 (m, 8H), 0.92 (t, *J* = 7.32 Hz, 12H).

**Compound 2:** This compound was synthesised in line with our previously published methods. Proton NMR were found to match our previously published values.<sup>1</sup> <sup>1</sup>H NMR (400 MHz, 298 K, DMSO-*d*<sub>6</sub>): δ: 9.25 (s, 1H), 7.95 – 7.75 (m, 4H), 7.58 (d, *J* = 8.74 Hz, 2H), 7.37 – 7.20 (m, 1H), 6.98 (t, *J* = 5.88 Hz, 1H), 3.96 (d, *J* = 5.88 Hz, 2H), 3.20 – 3.01 (m, 9H), 2.43 (s, 3H), 1.63 – 1.43 (m, 9H), 1.40 – 1.17 (m, 9H), 0.91 (t, *J* = 7.32 Hz, 12H).

**Compound 3:** This compound was synthesised in line with our previously published methods. Proton NMR were found to match our previously published values.<sup>2</sup> <sup>1</sup>H NMR (400 MHz, 298 K, DMSO-*d*<sub>6</sub>): δ: 0.92 (t, *J* = 7.36 Hz, 12H), 1.25 - 1.35 (br m, 8H), 1.52 - 1.60 (br m, 8H), 3.14 - 3.18 (br m, 8H), 3.93 (d, *J* = 5.96 Hz, 2H), 6.98 (t, *J* = 5.96 Hz, 1H), 7.49 (d, *J* = 9.16 Hz, *J* = 8.72 Hz, 2H), 7.56 (d, *J* = 8.72 Hz, 2H), 9.26 (s, 1H).

## Nanodisc synthesis and purification

### **Solubilisation/hydrolysis of Styrene-Maleic Anhydride to produce Styrene-Maleic Acid (SMA):**

Commercially available styrene-maleic anhydride polymer, with a ratio of 2:1 styrene to maleic anhydride (SMA2000 polymer purchased from Cray Valley via Dr. Timothy Knowles), was first hydrolysed under reflux conditions. Styrene-maleic anhydride powder (25 g) was suspended in NaOH (250 mL, 1.0 M) with anti-bumping granules (0.1 g) and slowly heated to reflux (100 °C) with constant stirring. The solution was refluxed for ~4 hours, until all of the solid styrene-maleic anhydride dissolved. Once the solution cooled (20 °C) the SMA was precipitated by reducing the pH to below 5 with the addition of concentrated HCl and monitoring the pH using pH paper. The precipitated polymer was centrifuged at 11,000 g for 15 minutes (4 °C), the supernatant was removed and the precipitate was washed with Milli Q water (3 x 250 mL). The polymer was then re-suspended in NaOH (0.6 M) and adjusted to pH 7.4 and left in an incubator overnight. Once completely solubilised the polymer was lyophilized and stored at room temperature.

***Escherichia coli* (E.coli) SMA nanodisc preparation:** The composition of the total *E. coli* lipid used in this instance was determined to be 67 % PE, 23.2 % PG and 9.8 % cardiolipin. This lipid composition was determined by Avanti Polar Lipids. *E. coli* total lipid extract (10 mg) was dissolved in methanol and chloroform (1:1 ratio) and evaporated under a stream of nitrogen, to form a thin lipid film. The resulting lipid film was dried for a further 1 hour under reduced pressure and an inert atmosphere. The lipid film was then hydrated and dispersed in 20 mM sodium phosphate buffer (pH 7.4) with 20 mM sodium chloride (1 mL) using sonication. SMA (50 mg) was added to the opaque lipid solution and incubated for 1 h at 37 °C, giving a translucent solution.

**DMPC SMA nanodisc preparation:** 1,2-Dimyristoyl-sn-glycero-3-phosphocholine (DMPC) lipid (10 mg) was dissolved in methanol and chloroform (1:1 ratio) and evaporated under a stream of nitrogen, to form a thin lipid film. The resulting lipid film was dried for a further 1 hour under reduced pressure and an inert atmosphere. The lipid film was then hydrated and dispersed in 20 mM sodium phosphate buffer (pH 7.4) with 20 mM sodium chloride (1 mL) using sonication. SMA (50 mg) was added to the opaque lipid solution and incubated for 1 h at 25 °C, giving a translucent solution.

**Nanodisc purification:** Nanodiscs samples (1 mL) were centrifuged at 208,000 g for 30 minutes at 4 °C, the supernatant was collected, and the pellet discarded. The nanodiscs were then dialysed overnight against 4 L sodium phosphate buffer (20 mM) with 20 mM sodium chloride at pH 7.4 for to remove free SMA with a 50 KDa cut-off dialysis tubing.

The crude nanodisc sample then underwent gel filtration chromatography, where nanodisc samples were concentrated prior to injection and gel filtrated on a Superdex 200 10/300 GL column (GE Healthcare) in the same phosphate buffer (pH 7.4), while monitoring absorbance at 260 nm, to verify the presence of the SMA. This phosphate buffer was used for all the experiments described.

**Calculation of Nanodisc refractive index (RI):** Nanodiscs were concentrated using a centrifugal concentrator with a 30,000 Da cut-off at 3220 g (4 °C). The refractive index was determined by taking the average of three samples of nanodiscs, using a manual benchtop refractometer ABBE 5 BS. Hexane was used as a control with a RI 1.375.

## Nanodisc quantification

**UV-Vis quantification:** Quantification of nanodisc concentration was carried out by UV-Vis spectroscopy using a NanodropOne spectrophotometer and known concentrations of the free SMA. Each measurement was repeated 3 times. Calibration was performed prior to use with a control solvent sample, and all spectra were zeroed at 750 nm. The absorbance at 260 nm was determined plotted in Excel giving a linear calibration curve. This was then used to quantify the concentration of nanodiscs in solution, as a single SMA is responsible for forming a single nanodisc (see manuscript for further details). The linear calibration curve produced from these experimental data is given in Figure S2. The average MW of the hydrolysed polymer was used to calculate the concentrations for the calibration curve.

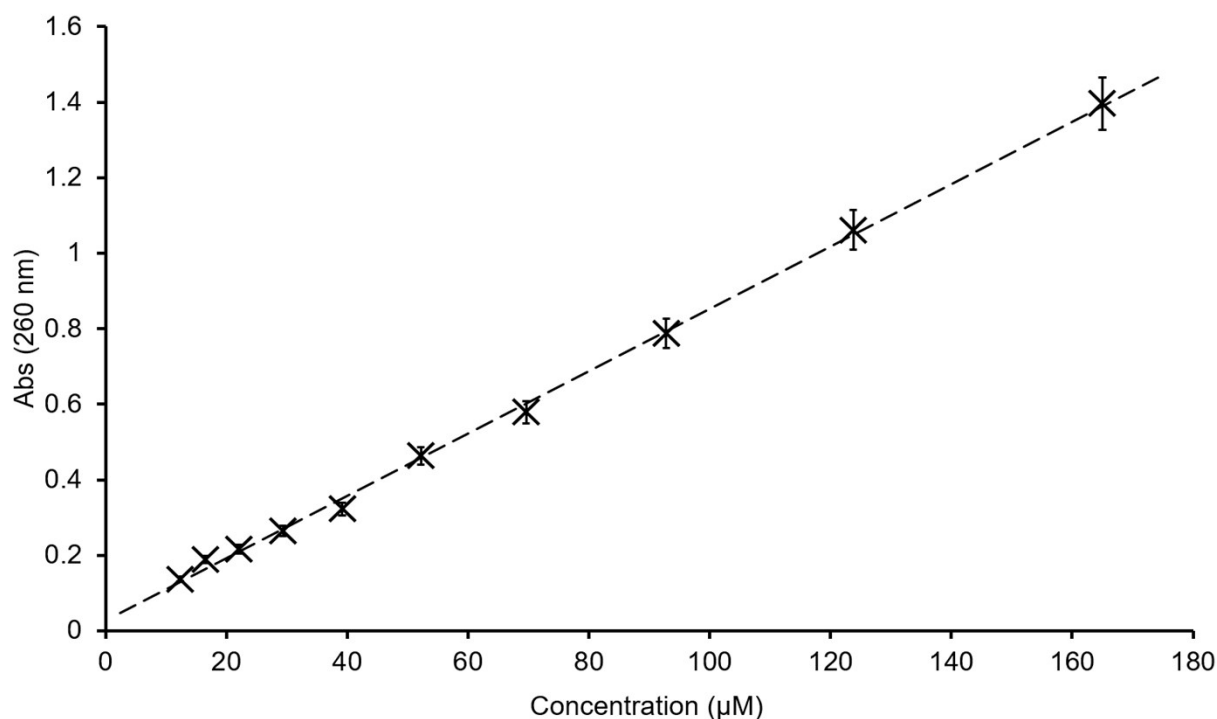

Figure S2 – Calibration curve for SMAs ( $n = 3$ ) in the absence of lipids, monitored by absorbance at 260 nm (fit  $A_{260} = 0.00083[\text{SMA } (\mu\text{M})] + 0.0279$   $R=0.9985$ ), in an aqueous phosphate buffered solution ( $\text{NaH}_2\text{PO}_4$  (20 mM),  $\text{NaCl}$  (20 mM) at pH 7.4).

## NMR methodology

**$^1\text{H}$  NMR CPMG:**  $^1\text{H}$  NMR CPMG<sup>3,4</sup> spectra were determined with a Bruker Avance III 600 Hz spectrometer equipped with a TCIP cryoprobe at 298 K. Samples were supplemented with 5%  $\text{D}_2\text{O}$  and 0.01 mM DSS (4,4-dimethyl-4-silapentane-1-sulfonic acid). The standard zgprcpmg pulse sequence from the Bruker library was modified with a watrgate element to allow suppression of the water signal was used for all experiments. Although this sequence is readily obtainable, we are happy to provide it on request. The P1 pulses were 9  $\mu\text{s}$  at a power of 7.9 W. Presaturation was applied between acquisitions for 100 ms at a power level of 280 mW and acquisition was carried out of 0.851 s. Water suppression was achieved with a 3-9-19 watrgate sequence using 1 ms pulses with a smoothed chirp shape with a peak strength of 21.2

G. The CPMG element had a length of 300 ms with delays between  $180^\circ$  pulses of 1 ms. Repetition times were chosen to achieve suitable water suppression with the presat and watergate sequences used in a 95 %  $\text{H}_2\text{O}$  solution. The length of the CPMG element used was chosen to achieve good differentiation between unbound and strongly bound ligands. Data was collected with 16,384 points and a spectral width of 16.0242 ppm, receiver gain was set to 256, with 128 scans, 16 dummy scans and an acquisition time of 0.85 s. Data was processed using MestreNova software. All spectra were automatically phased, baseline corrected using a polynomial function and calibrated to the centre of the DSS peak. The water signal was suppressed in MestreNova using a convolution method in those experiments with poor water suppression.

## DLS nanodisc characterisation data

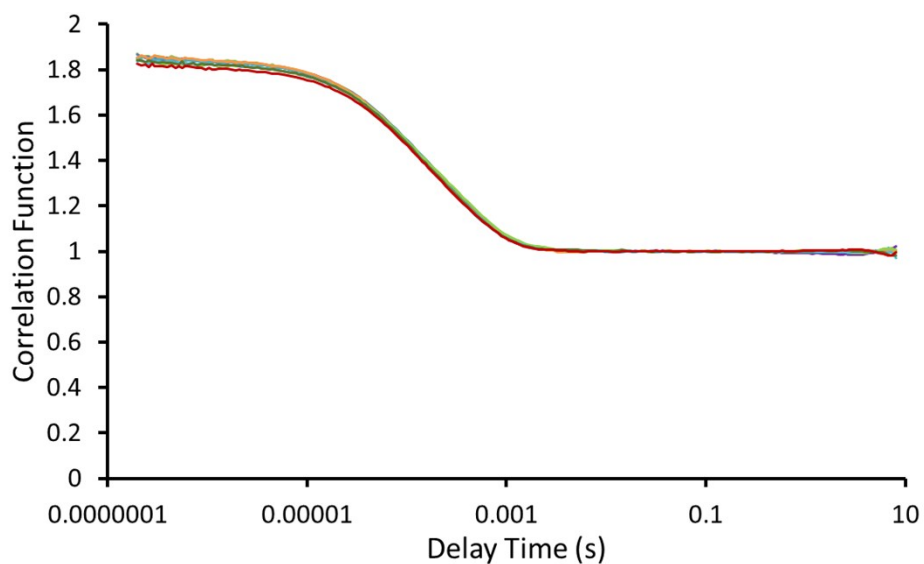

Figure S3 – Correlation function data relating to Figure S4.

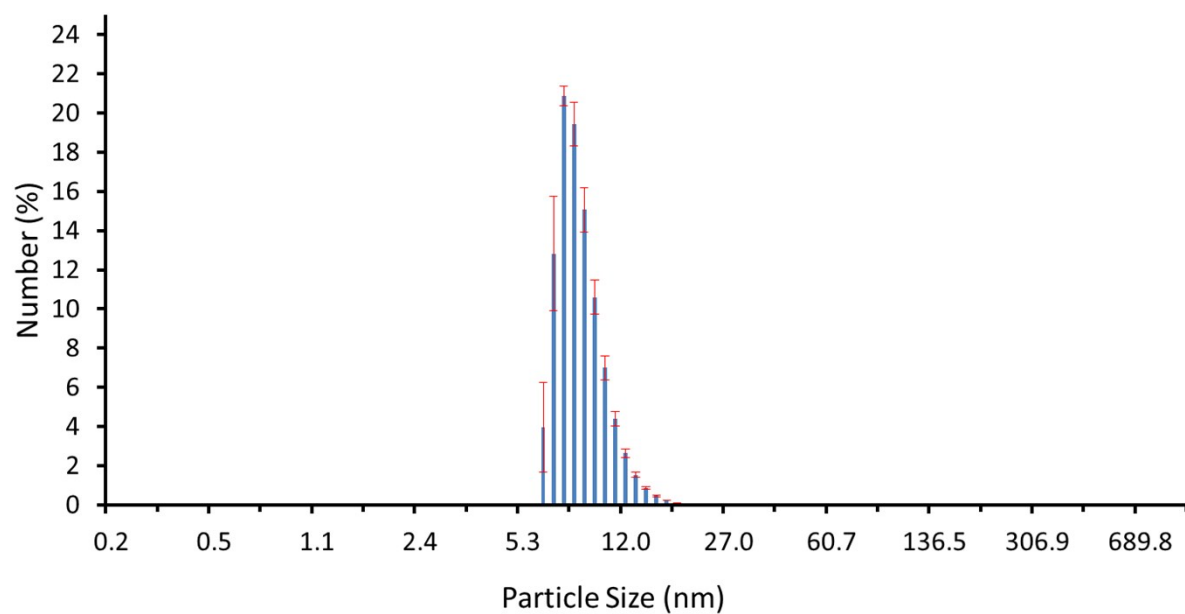

Figure S4 – Average number weighted particle size distribution of *E. coli* SMA nanodiscs (326.6  $\mu$ M), in sodium phosphate buffer (20 mM) with 20 mM sodium chloride at pH 7.4, calculated from 9 DLS runs at 298 K. Error given is the standard error of the mean.

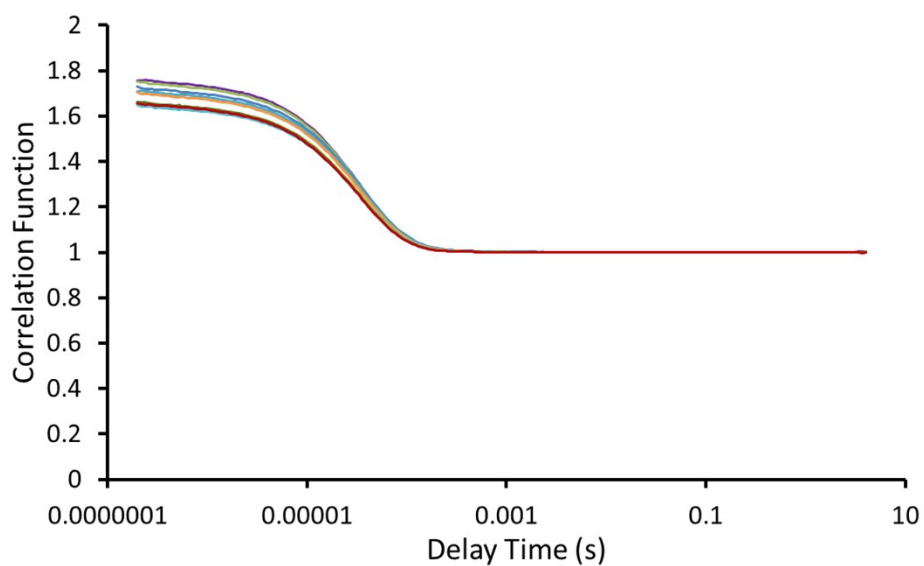

Figure S5 – Correlation function data relating to Figure S6.

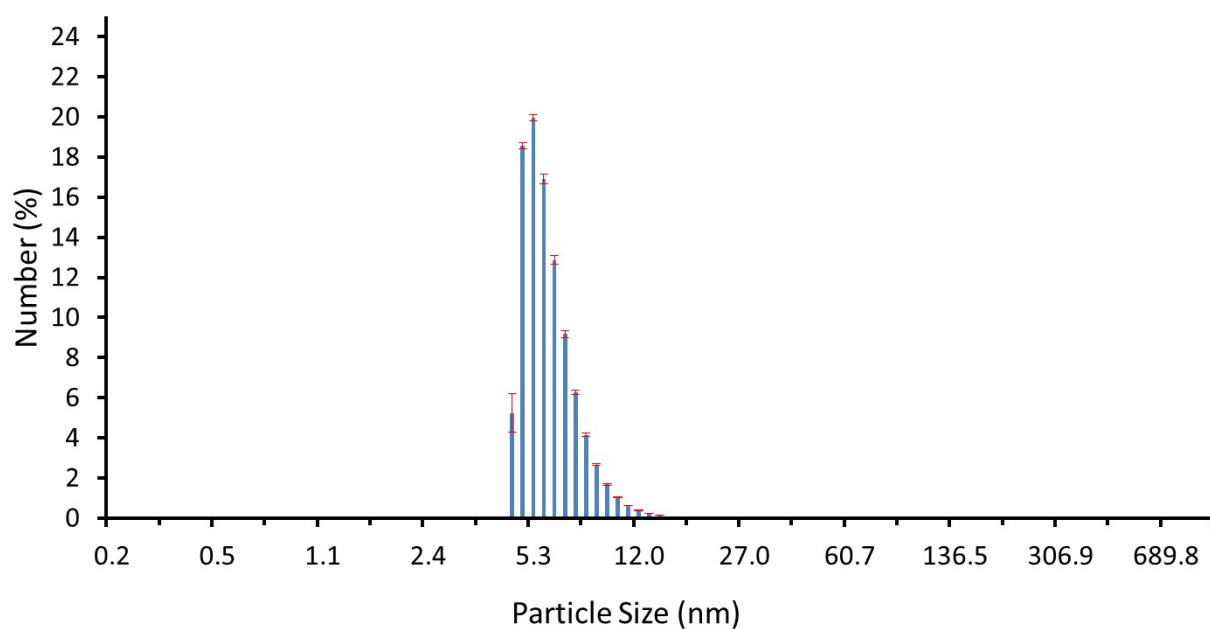

Figure S6 – Average number weighted particle size distribution of DMPC SMA nanodiscs (412  $\mu\text{M}$ ), in sodium phosphate buffer (20 mM) with 20 mM sodium chloride at pH 7.4, calculated from 9 DLS runs at 298 K. Error given is the standard error of the mean.

## Zeta potential nanodisc characterisation data

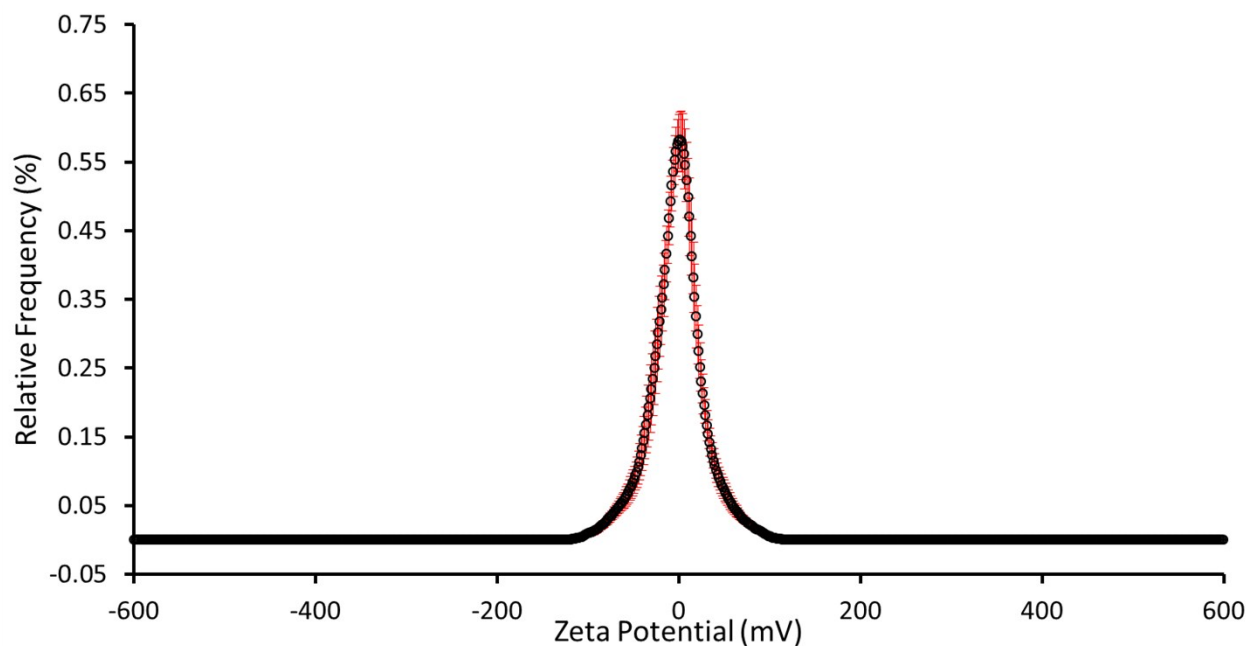

Figure S7 – Zeta potential data for *E. coli* SMA nanodiscs (592.9  $\mu\text{M}$ ) in sodium phosphate buffer (20 mM) with 20 mM sodium chloride at pH 7.4, calculated from 10 runs at 298 K, giving a mean average of -20.38 mV. Error given is the standard error of the mean.

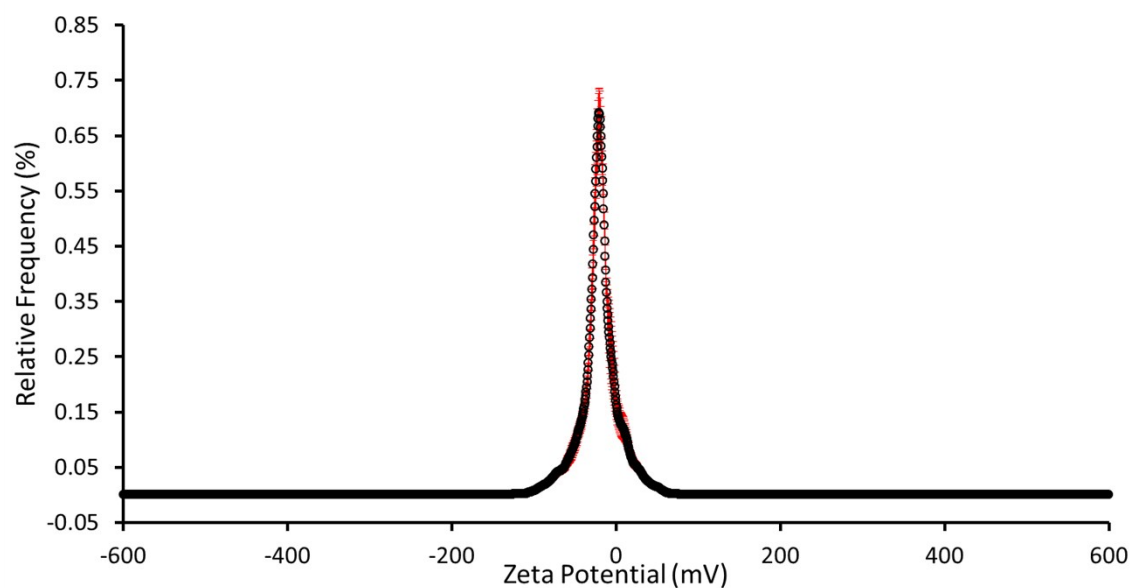

Figure S8 – Zeta potential data for DMPC SMA nanodiscs (412  $\mu\text{M}$ ) in sodium phosphate buffer (20 mM) with 20 mM sodium chloride at pH 7.4, calculated from 10 runs at 298 K, giving a mean average of -8.50 mV. Error given is the standard error of the mean.

## TEM nanodisc characterisation data

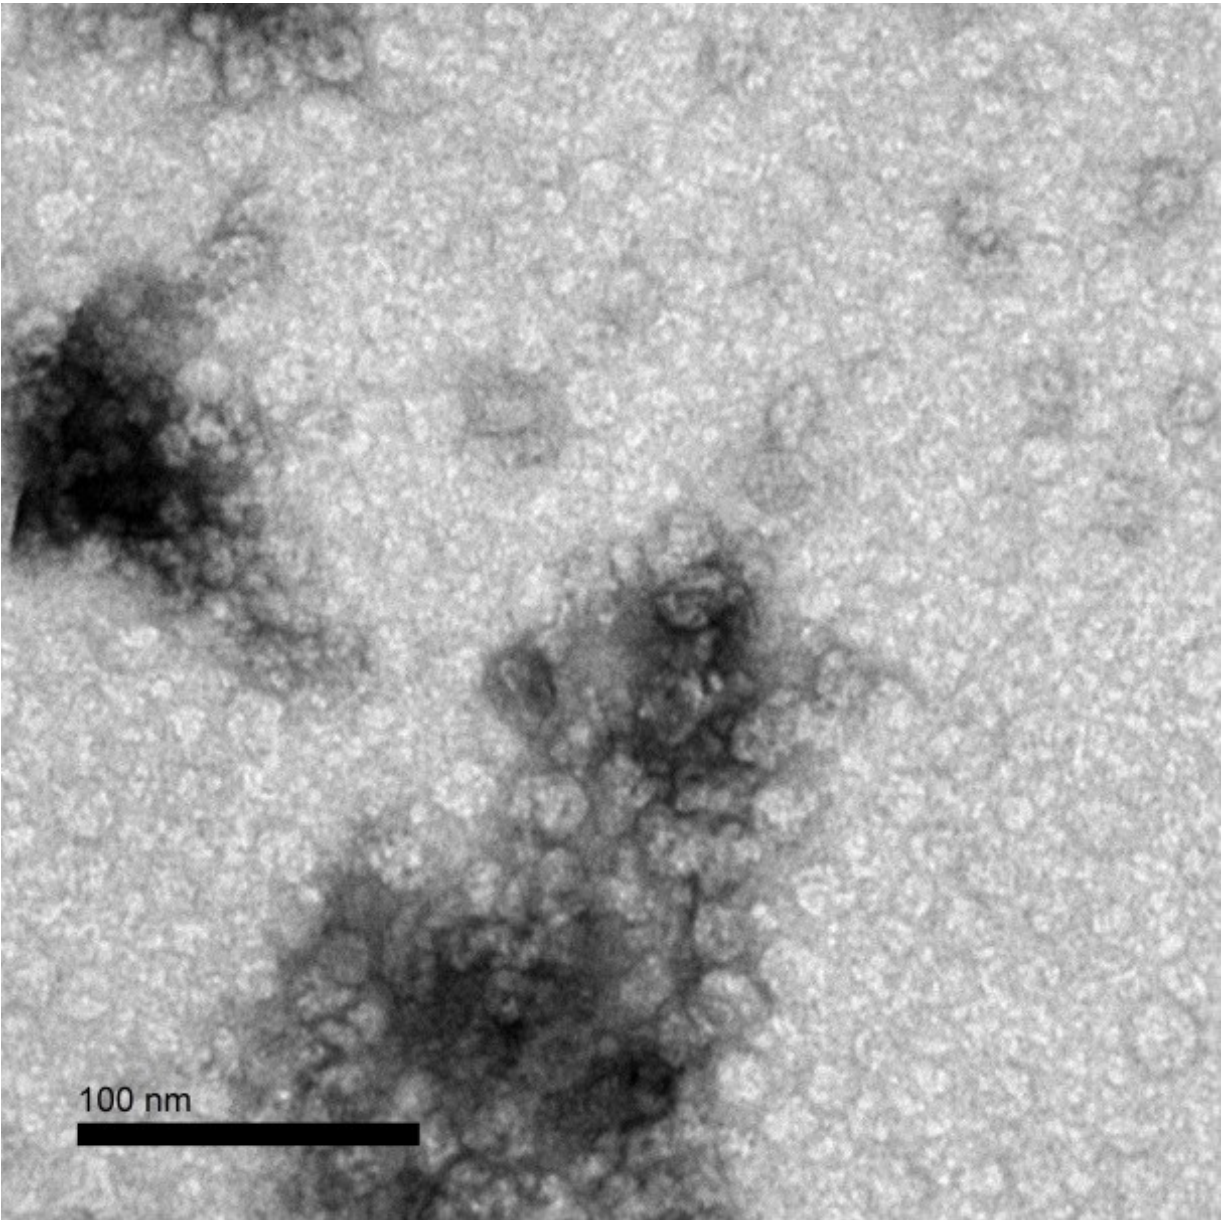

Figure S9 – TEM image of dehydrated *E. coli* SMA nanodiscs.

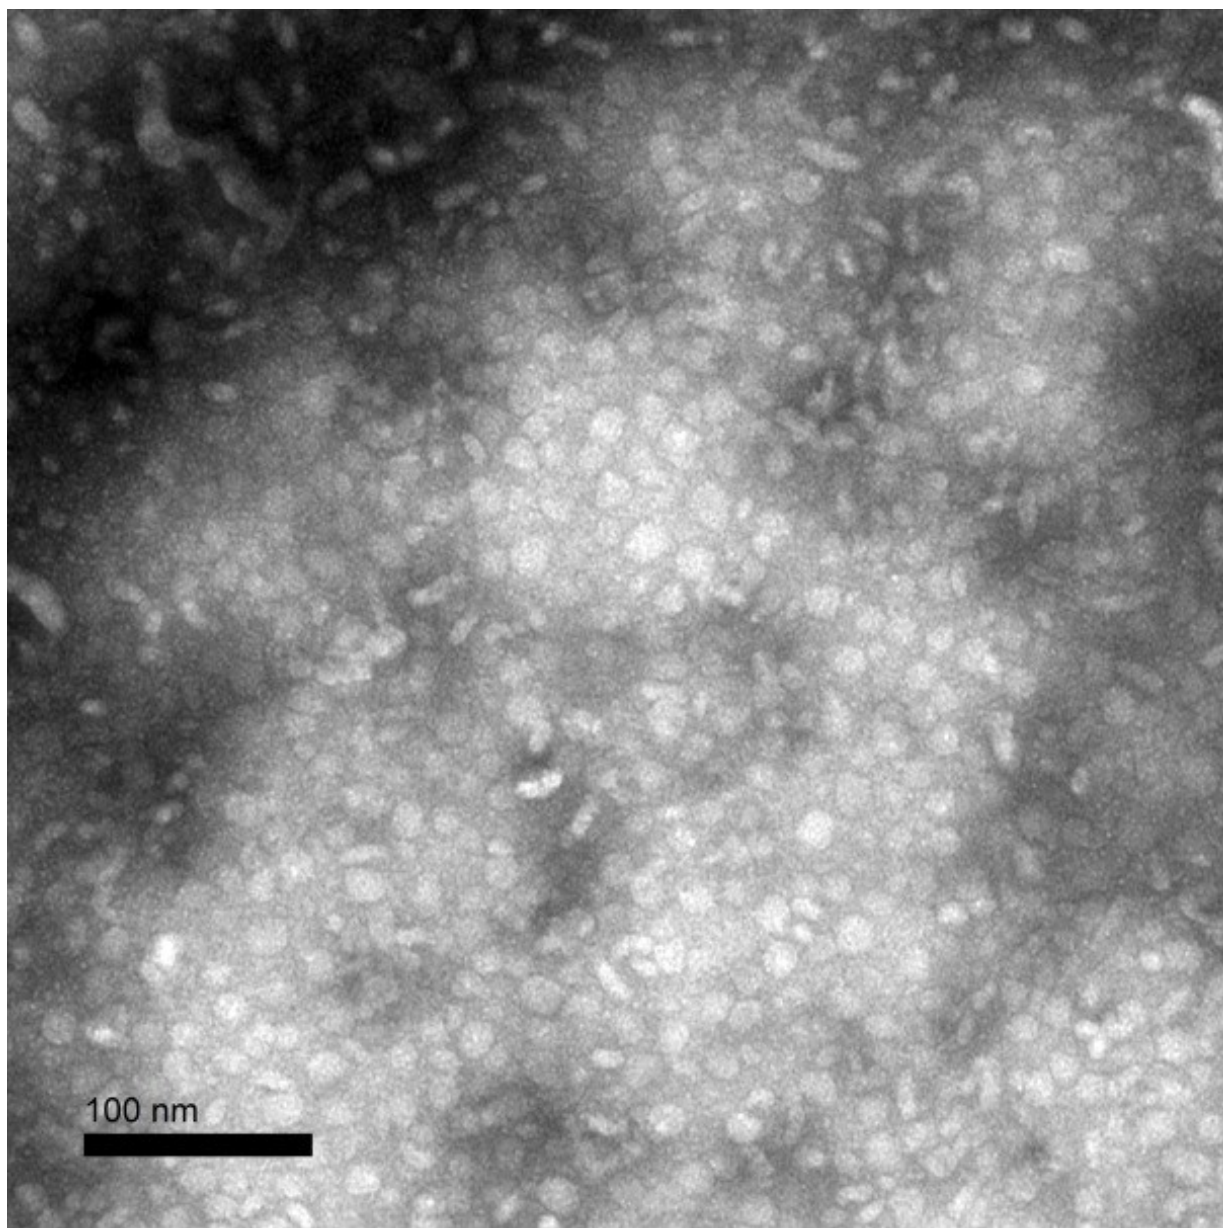

Figure S10 – TEM image of dehydrated DMPC SMA nanodiscs.

## $^1\text{H}$ NMR SSA:Nanodisc data

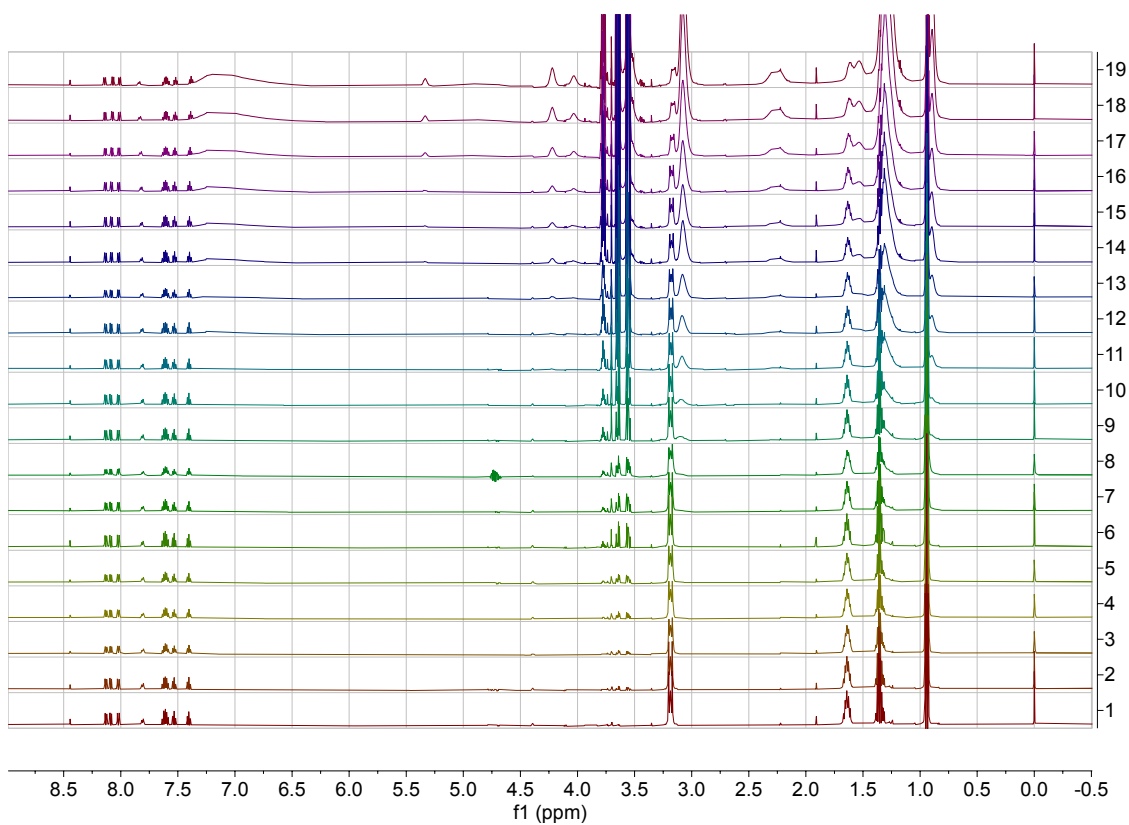

Figure S11 – Stack of 1D  $^1\text{H}$  NMR spectrum of **1** at 0.1 mM with increasing concentration of DMPC SMA nanodiscs (SMA nanodisc molar equivalents = 0 (bottom), 0.002, 0.004, 0.006, 0.008, 0.01, 0.015, 0.02, 0.03, 0.04, 0.06, 0.08, 0.1, 0.15, 0.20, 0.25, 0.5 and 1 (top)) in sodium phosphate buffer (20 mM) with 20 mM sodium chloride at pH 7.4, supplemented with 5%  $\text{D}_2\text{O}$  and 0.01 mM DSS.

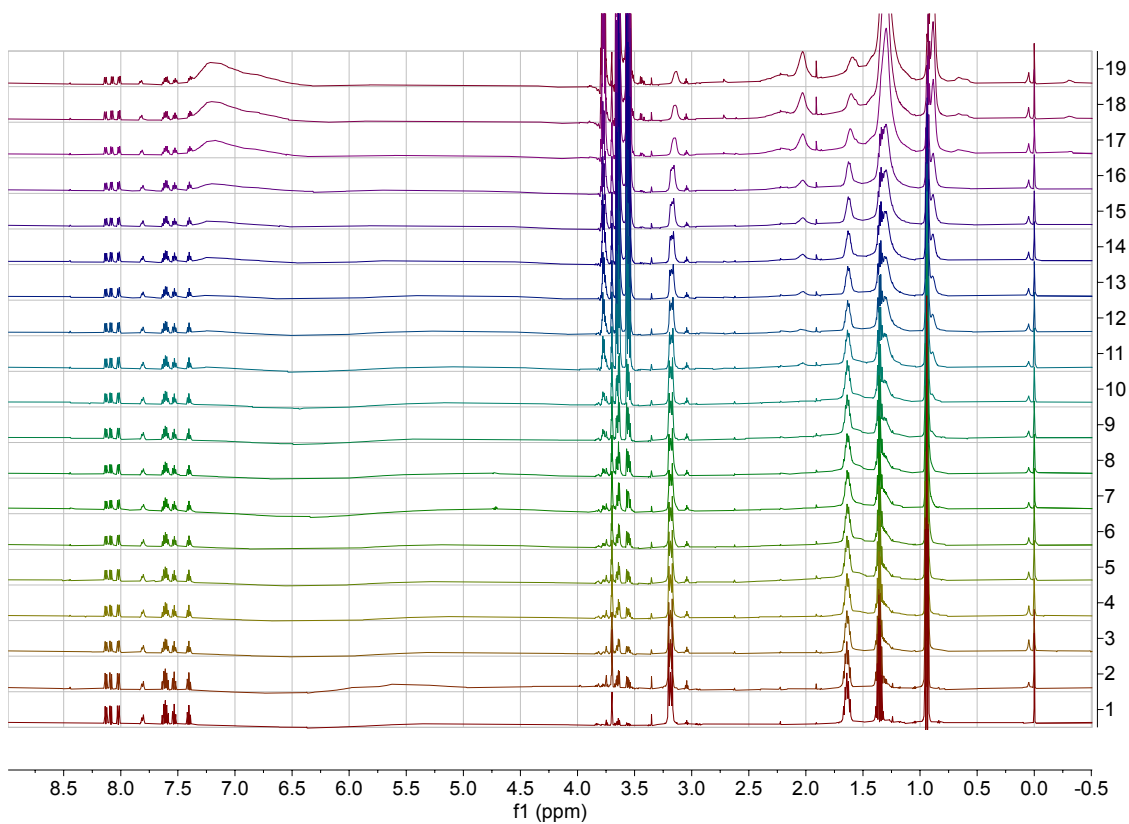

Figure S12 – Stack of 1D  $^1\text{H}$  NMR spectrum of **1** at 0.1 mM with increasing concentration of *E. coli* SMA nanodiscs (SMA nanodisc molar equivalents = 0 (bottom), 0.002, 0.004, 0.006, 0.008, 0.01, 0.015, 0.02, 0.03, 0.04, 0.06, 0.08, 0.1, 0.15, 0.20, 0.25, 0.5 and 1 (top)) in sodium phosphate buffer (20 mM) with 20 mM sodium chloride at pH 7.4, supplemented with 5%  $\text{D}_2\text{O}$  and 0.01 mM DSS.

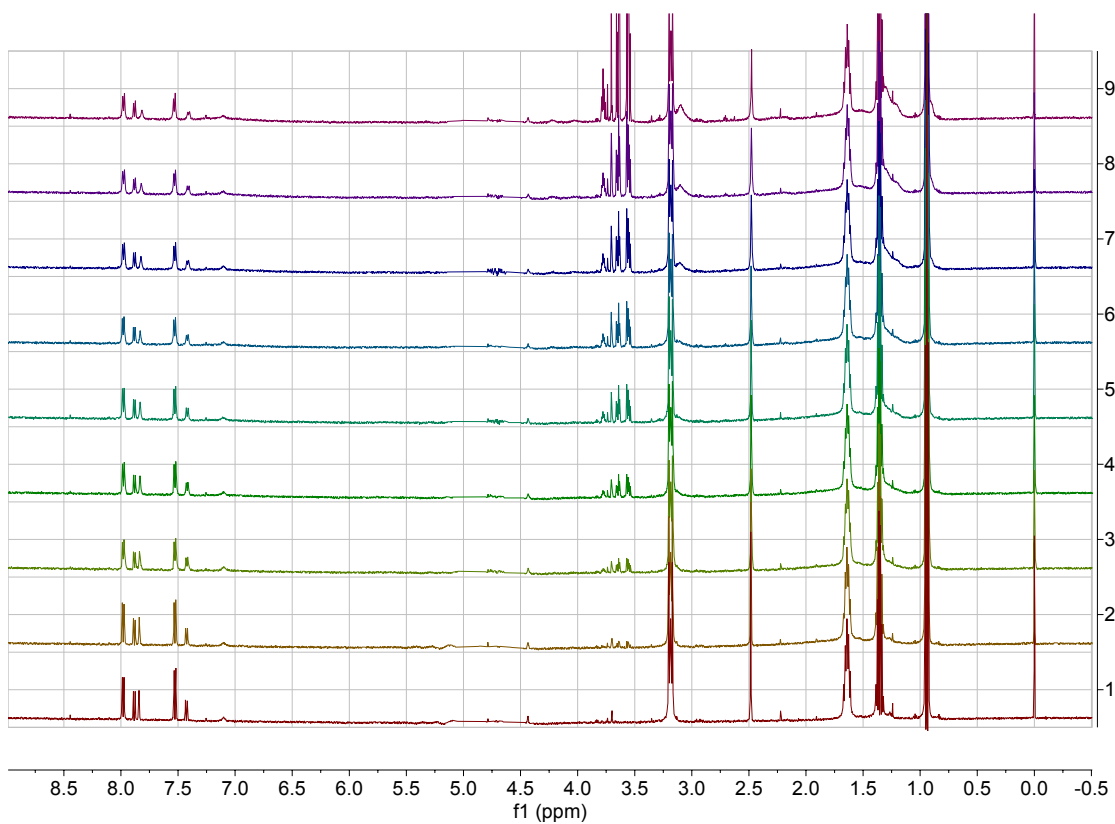

Figure S13 – Stack of 1D  $^1\text{H}$  NMR spectrum of **2** at 0.1 mM with increasing concentration of DMPC SMA nanodiscs (SMA nanodisc molar equivalents = 0 (bottom), 0.002, 0.004, 0.006, 0.008, 0.01, 0.015, 0.021, 0.032, (top)) in sodium phosphate buffer (20 mM) with 20 mM sodium chloride at pH 7.4, supplemented with 5%  $\text{D}_2\text{O}$  and 0.01 mM DSS.

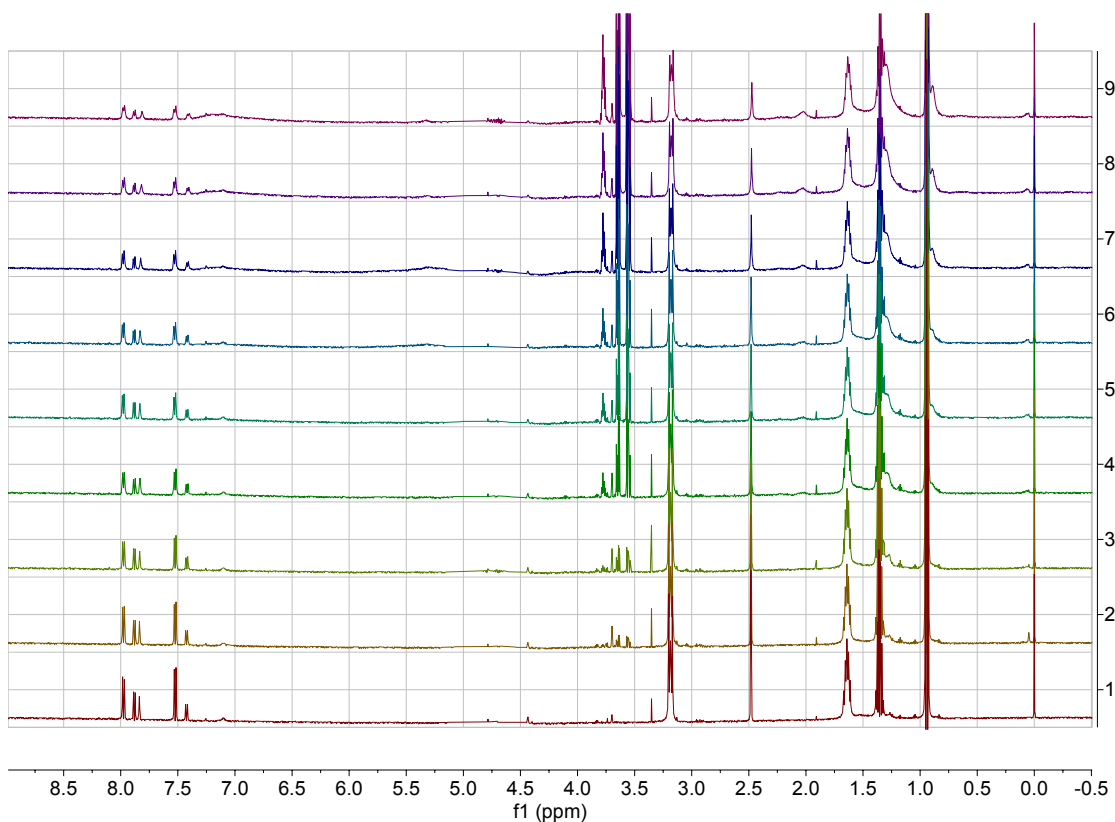

Figure S14 – Stack of 1D  $^1\text{H}$  NMR spectrum of **2** at 0.1 mM with increasing concentration of *E. coli* SMA nanodiscs (SMA nanodisc molar equivalents = 0 (bottom), 0.002, 0.004, 0.006, 0.008, 0.01, 0.015, 0.021, 0.032, (top)) in sodium phosphate buffer (20 mM) with 20 mM sodium chloride at pH 7.4, supplemented with 5%  $\text{D}_2\text{O}$  and 0.01 mM DSS.

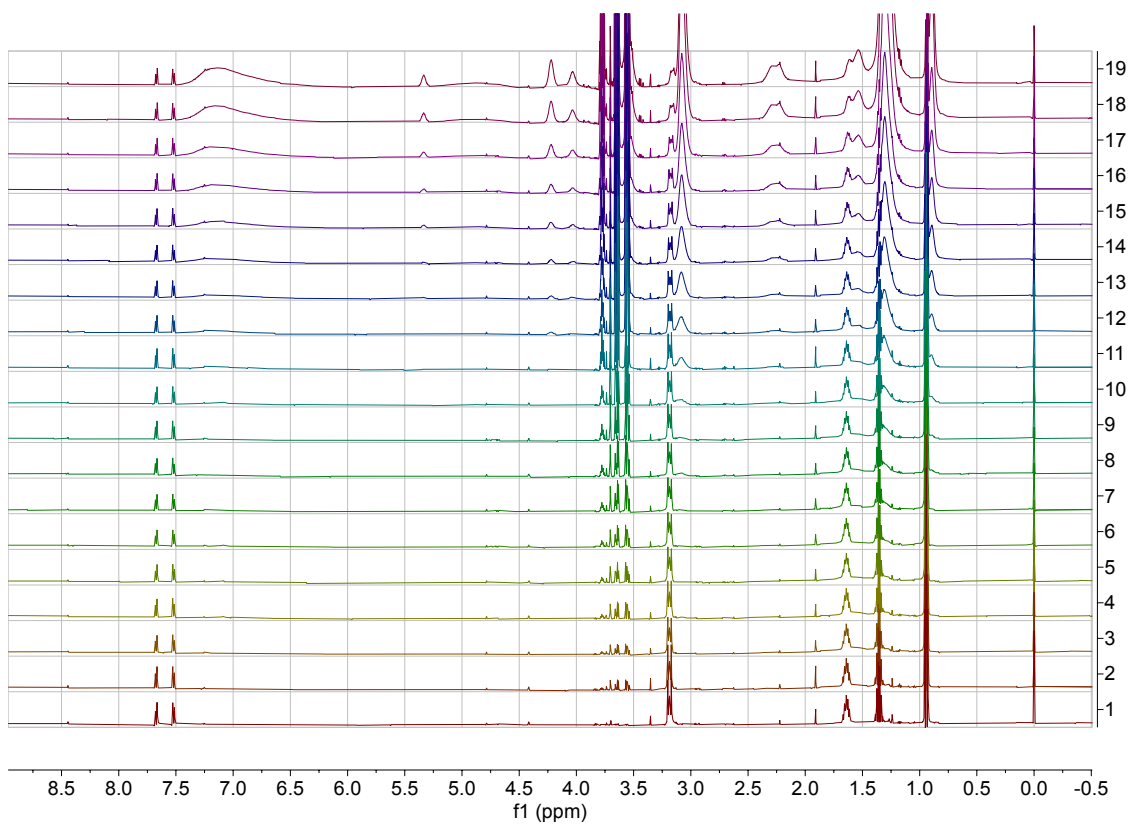

Figure S15 – Stack of 1D  $^1\text{H}$  NMR spectrum of **3** at 0.1 mM with increasing concentration of DMPC SMA nanodiscs (SMA nanodisc molar equivalents = 0 (bottom), 0.002, 0.004, 0.006, 0.008, 0.01, 0.015, 0.021, 0.032, .043, 0.064, 0.086, 0.108, 0.163, 0.219, 0.276, 0.572, 0.890, 1.229 (top)) in sodium phosphate buffer (20 mM) with 20 mM sodium chloride at pH 7.4, supplemented with 5%  $\text{D}_2\text{O}$  and 0.01 mM DSS.

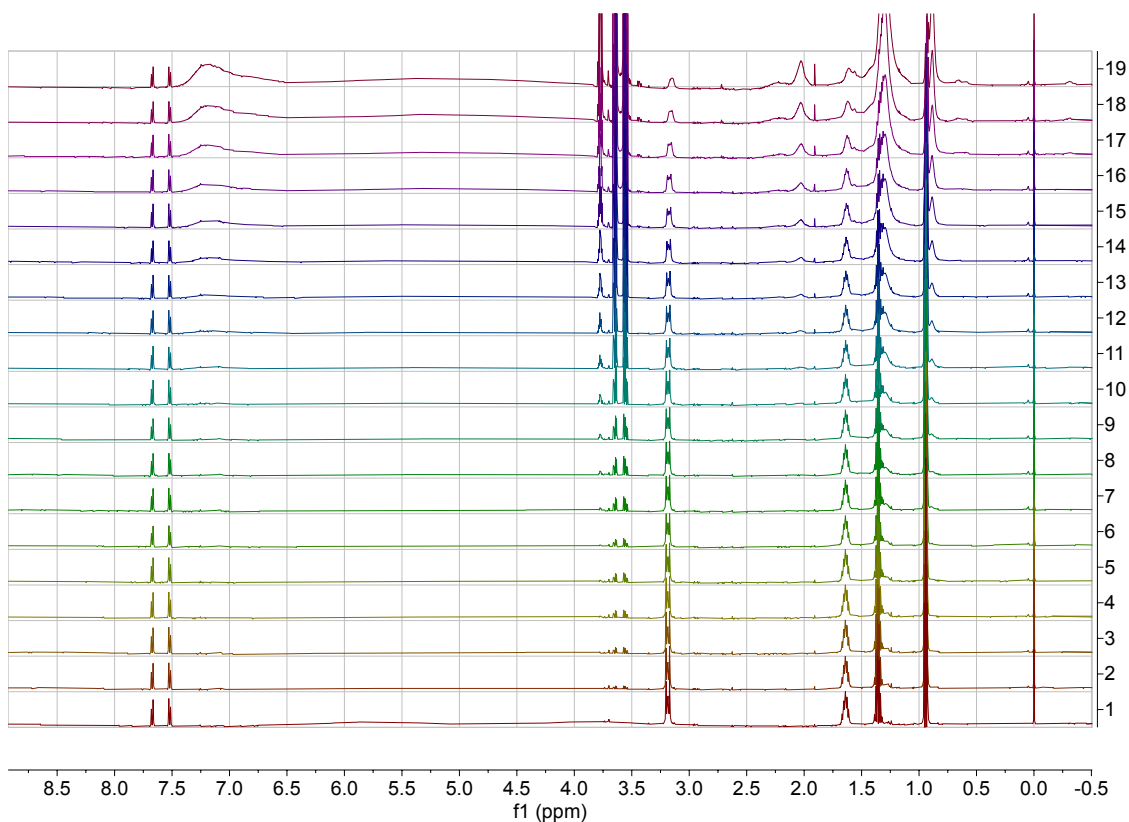

Figure S16 – Stack of 1D  $^1\text{H}$  NMR spectrum of **3** at 0.1 mM with increasing concentration of *E. coli* SMA nanodiscs (SMA nanodisc molar equivalents = 0 (bottom), 0.002, 0.004, 0.006, 0.008, 0.01, 0.015, 0.021, 0.032, .043, 0.064, 0.086, 0.108, 0.163, 0.219, 0.276, 0.572, 0.890, 1.229 (top)) in sodium phosphate buffer (20 mM) with 20 mM sodium chloride at pH 7.4, supplemented with 5%  $\text{D}_2\text{O}$  and 0.01 mM DSS.

## $^1\text{H}$ NMR SSA:Nanodisc CPMG data

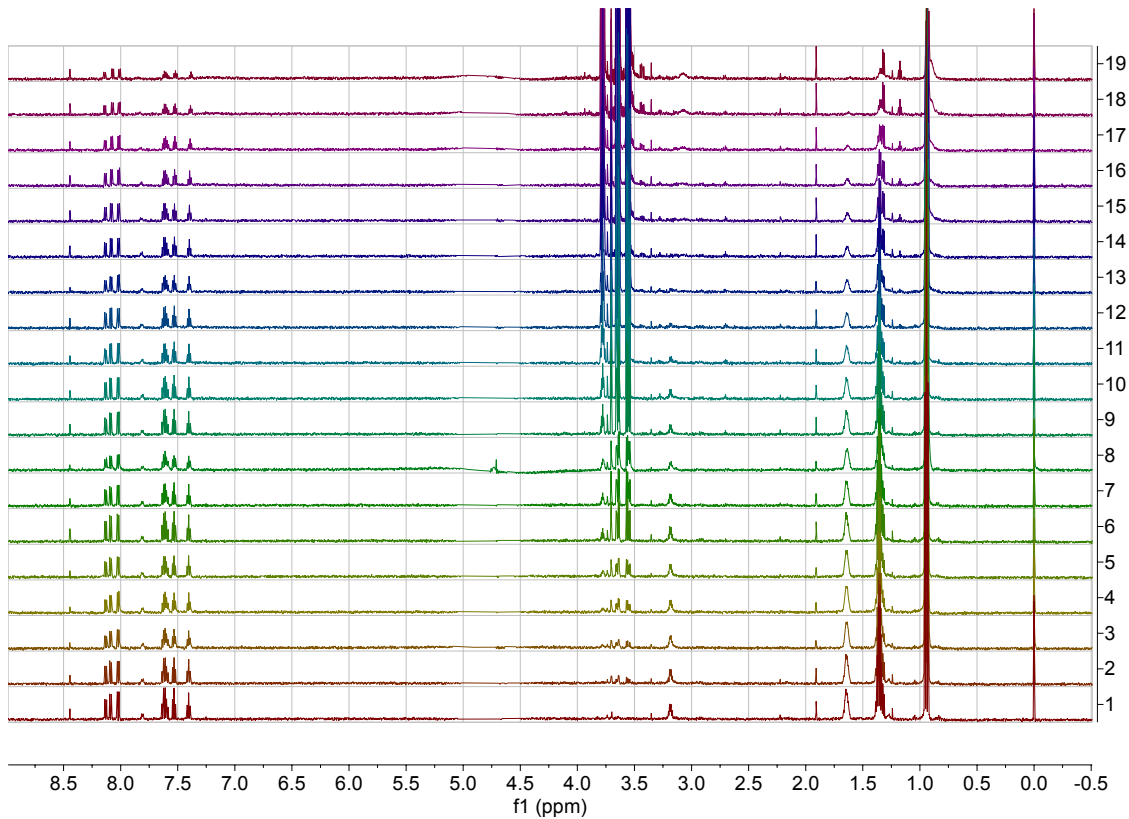

Figure S17 – Stack of 1D  $^1\text{H}$  CPMG NMR spectrum of **1** at 0.1 mM with increasing concentration of DMPC SMA nanodiscs (SMA nanodisc molar equivalents = 0 (bottom), 0.002, 0.004, 0.006, 0.008, 0.01, 0.015, 0.02, 0.03, 0.04, 0.06, 0.08, 0.1, 0.15, 0.20, 0.25, 0.5 and 1 (top)) in sodium phosphate buffer (20 mM) with 20 mM sodium chloride at pH 7.4, supplemented with 5%  $\text{D}_2\text{O}$  and 0.01 mM DSS.

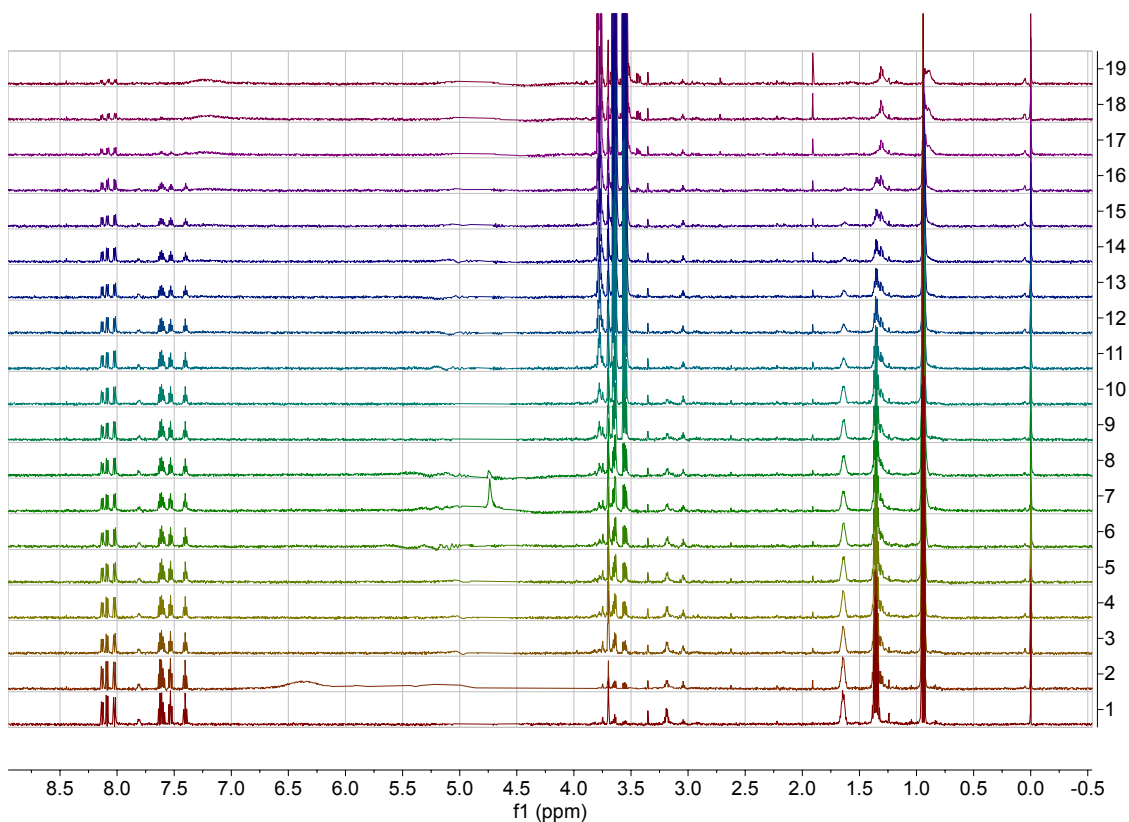

Figure S18 – Stack of 1D  $^1\text{H}$  CPMG NMR spectrum of **1** at 0.1 mM with increasing concentration of *E. coli* SMA nanodiscs (SMA nanodisc molar equivalents = 0 (bottom), 0.002, 0.004, 0.006, 0.008, 0.01, 0.015, 0.02, 0.03, 0.04, 0.06, 0.08, 0.1, 0.15, 0.20, 0.25, 0.5 and 1 (top)) in sodium phosphate buffer (20 mM) with 20 mM sodium chloride at pH 7.4, supplemented with 5%  $\text{D}_2\text{O}$  and 0.01 mM DSS.

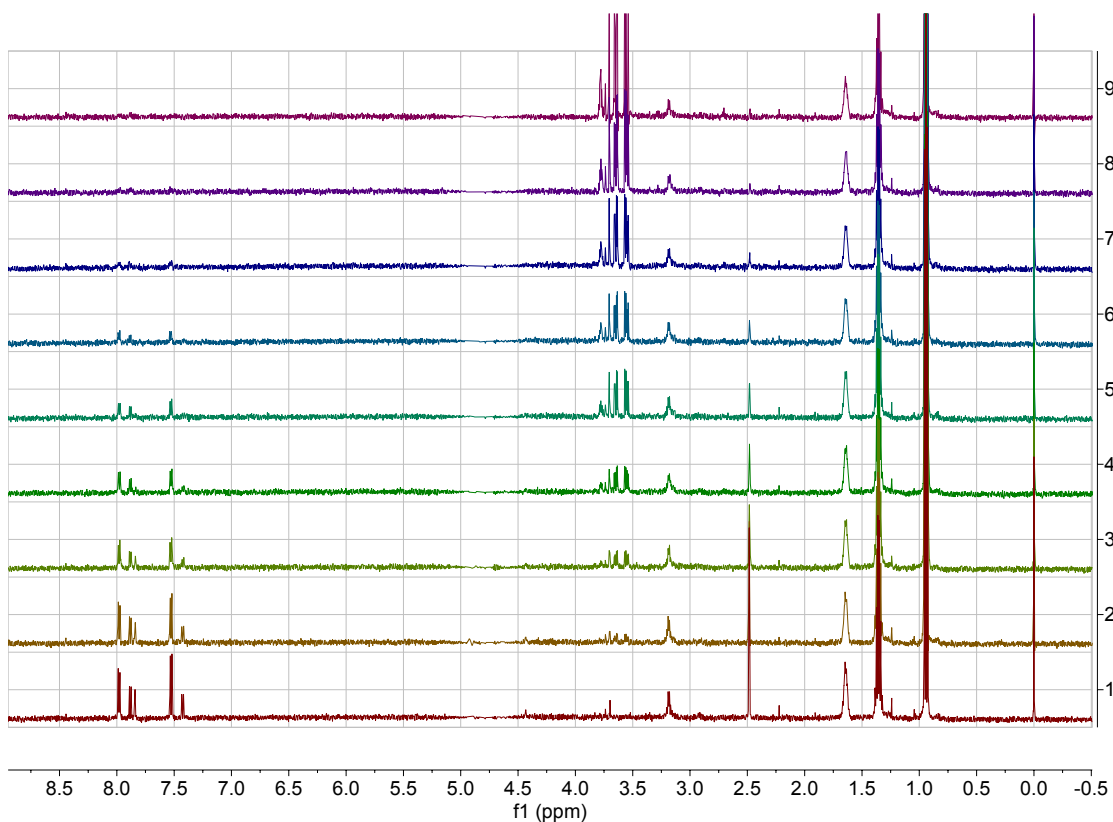

Figure S19 – Stack of 1D  $^1\text{H}$  CPMG NMR spectrum of **2** at 0.1 mM with increasing concentration of DMPC SMA nanodiscs (SMA nanodisc molar equivalents = 0 (bottom), 0.002, 0.004, 0.006, 0.008, 0.01, 0.015, 0.021, 0.032, (top)) in sodium phosphate buffer (20 mM) with 20 mM sodium chloride at pH 7.4, supplemented with 5%  $\text{D}_2\text{O}$  and 0.01 mM DSS.

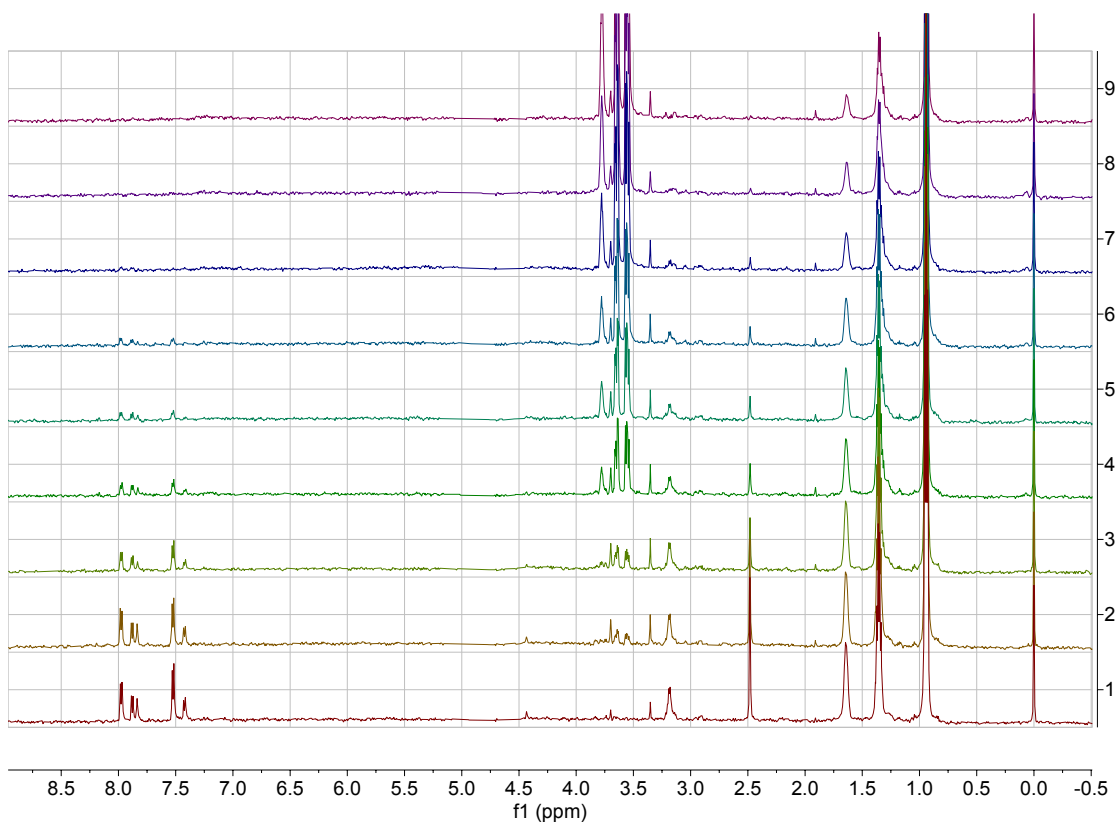

Figure S20 – Stack of 1D  $^1\text{H}$  CPMG NMR spectrum of **2** at 0.1 mM with increasing concentration of *E. coli* SMA nanodiscs (SMA nanodisc molar equivalents = 0 (bottom), 0.002, 0.004, 0.006, 0.008, 0.01, 0.015, 0.021, 0.032, (top)) in sodium phosphate buffer (20 mM) with 20 mM sodium chloride at pH 7.4, supplemented with 5%  $\text{D}_2\text{O}$  and 0.01 mM DSS.

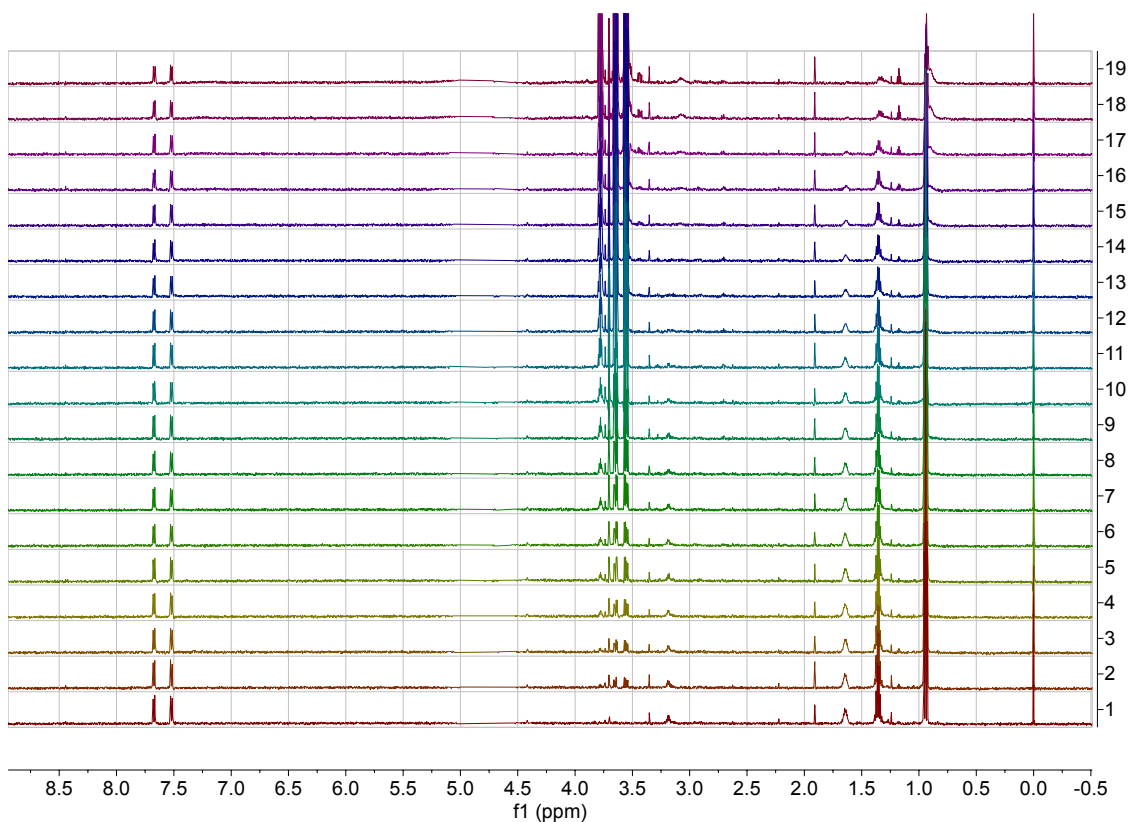

Figure S21 – Stack of 1D <sup>1</sup>H CPMG NMR spectrum of **3** at 0.1 mM with increasing concentration of DMPC SMA nanodiscs (SMA nanodisc molar equivalents = 0 (bottom), 0.002, 0.004, 0.006, 0.008, 0.01, 0.015, 0.021, 0.032, .043, 0.064, 0.086, 0.108, 0.163, 0.219, 0.276, 0.572, 0.890, 1.229 (top)) in sodium phosphate buffer (20 mM) with 20 mM sodium chloride at pH 7.4, supplemented with 5% D<sub>2</sub>O and 0.01 mM DSS.

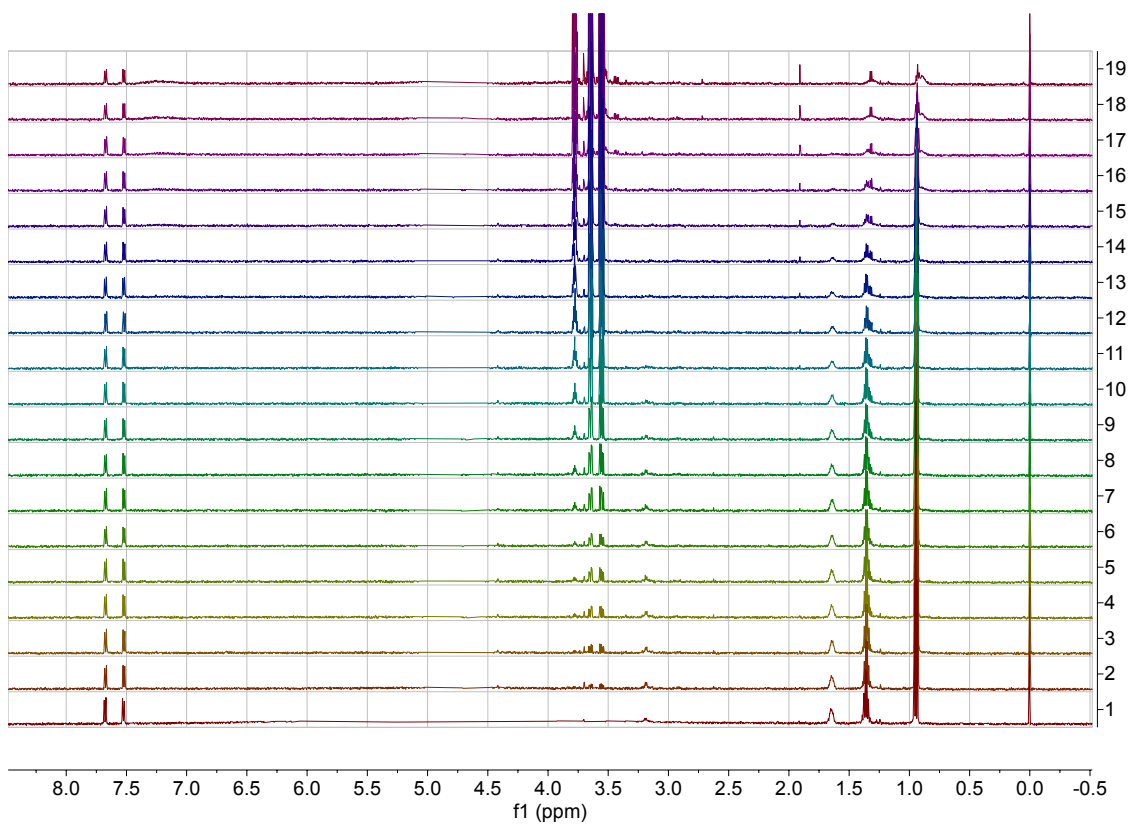

Figure S22 – Stack of 1D  $^1\text{H}$  CPMG NMR spectrum of **3** at 0.1 mM with increasing concentration of *E. coli* SMA nanodiscs (SMA nanodisc molar equivalents = 0 (bottom), 0.002, 0.004, 0.006, 0.008, 0.01, 0.015, 0.021, 0.032, .043, 0.064, 0.086, 0.108, 0.163, 0.219, 0.276, 0.572, 0.890, 1.229 (top)) in sodium phosphate buffer (20 mM) with 20 mM sodium chloride at pH 7.4, supplemented with 5%  $\text{D}_2\text{O}$  and 0.01 mM DSS.

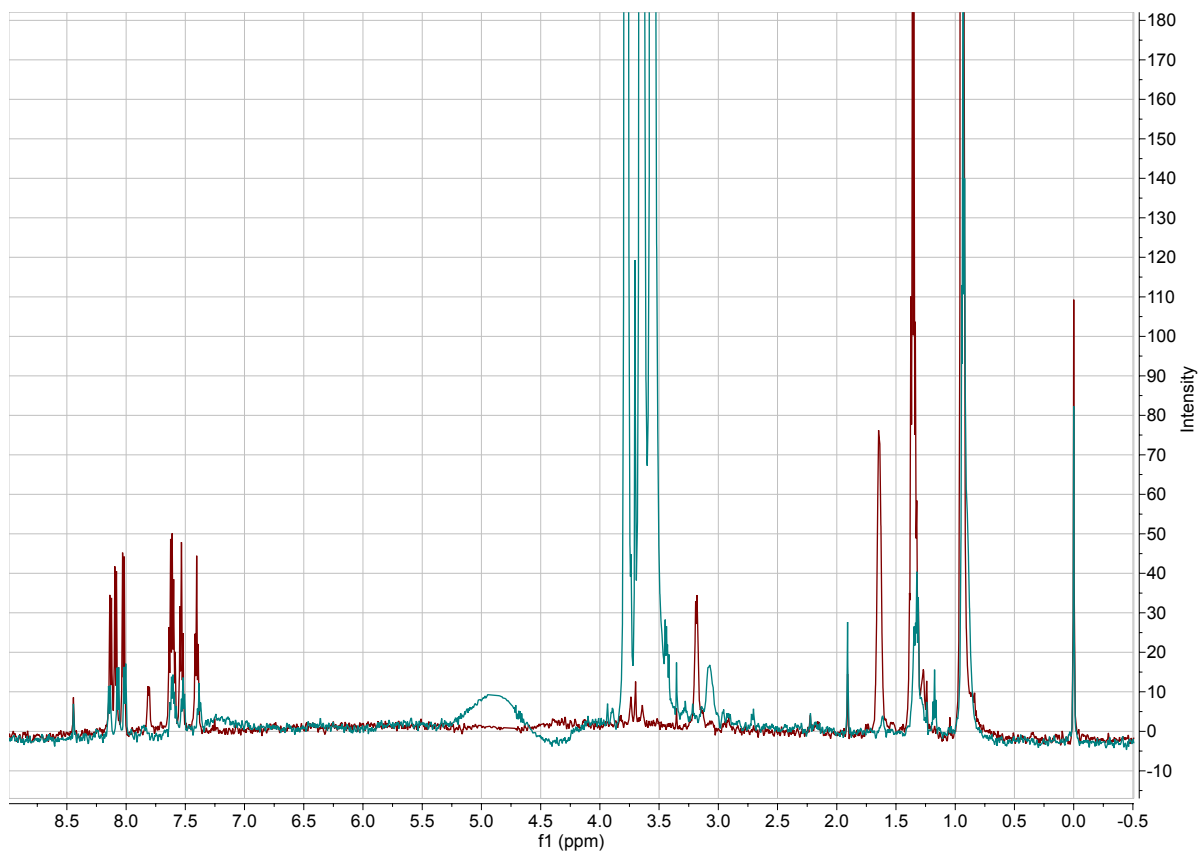

Figure S23 – Overlaid 1D <sup>1</sup>H CPMG NMR spectrum of **1** (0.10 mM) only (red) and **1** in the presence of one molar equivalent DMPC SMA nanodiscs (green) in sodium phosphate buffer (20 mM) with 20 mM sodium chloride at pH 7.4, supplemented with 5% D<sub>2</sub>O and 0.01 mM DSS.

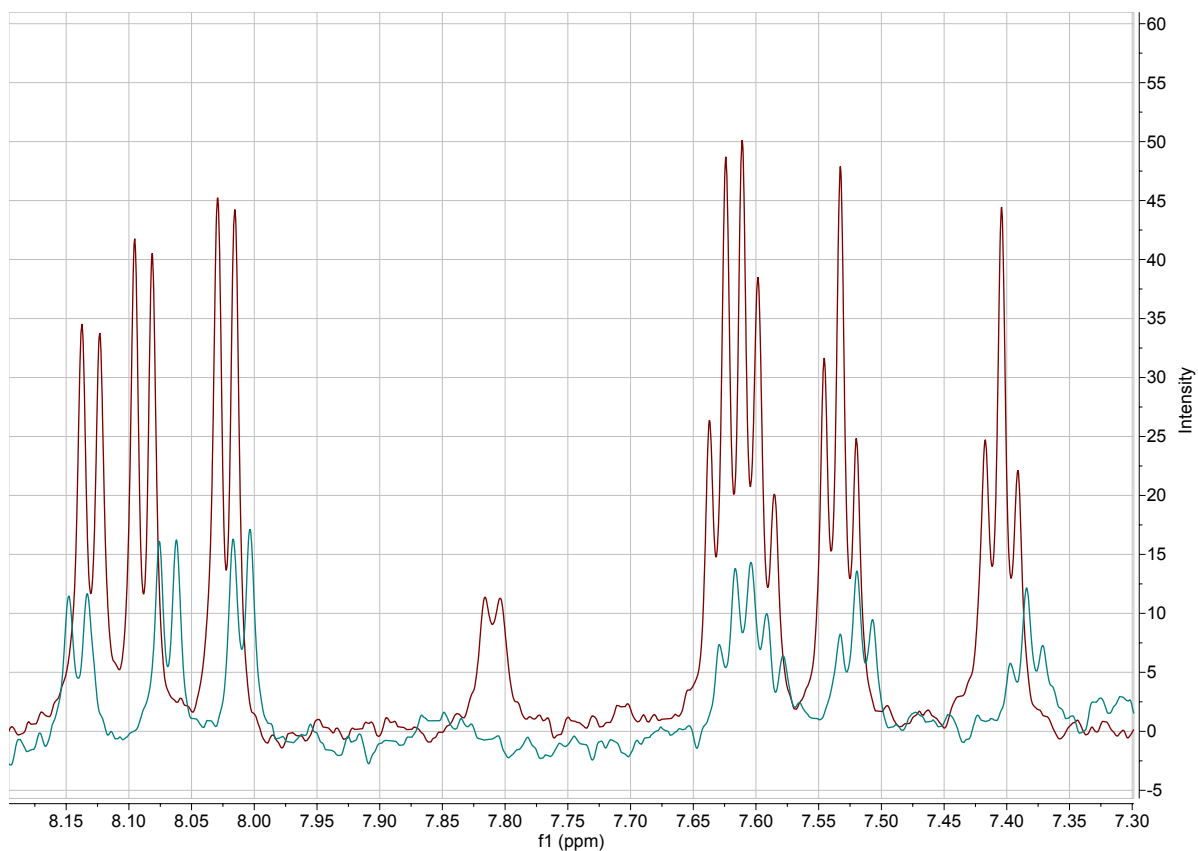

Figure S24 – Overlaid aromatic region of the 1D <sup>1</sup>H CPMG NMR spectrum of **1** (0.10 mM) only (red) and **1** in the presence of one molar equivalent of DMPC SMA nanodiscs (green) in sodium phosphate buffer (20 mM) with 20 mM sodium chloride at pH 7.4, supplemented with 5% D<sub>2</sub>O and 0.01 mM DSS.

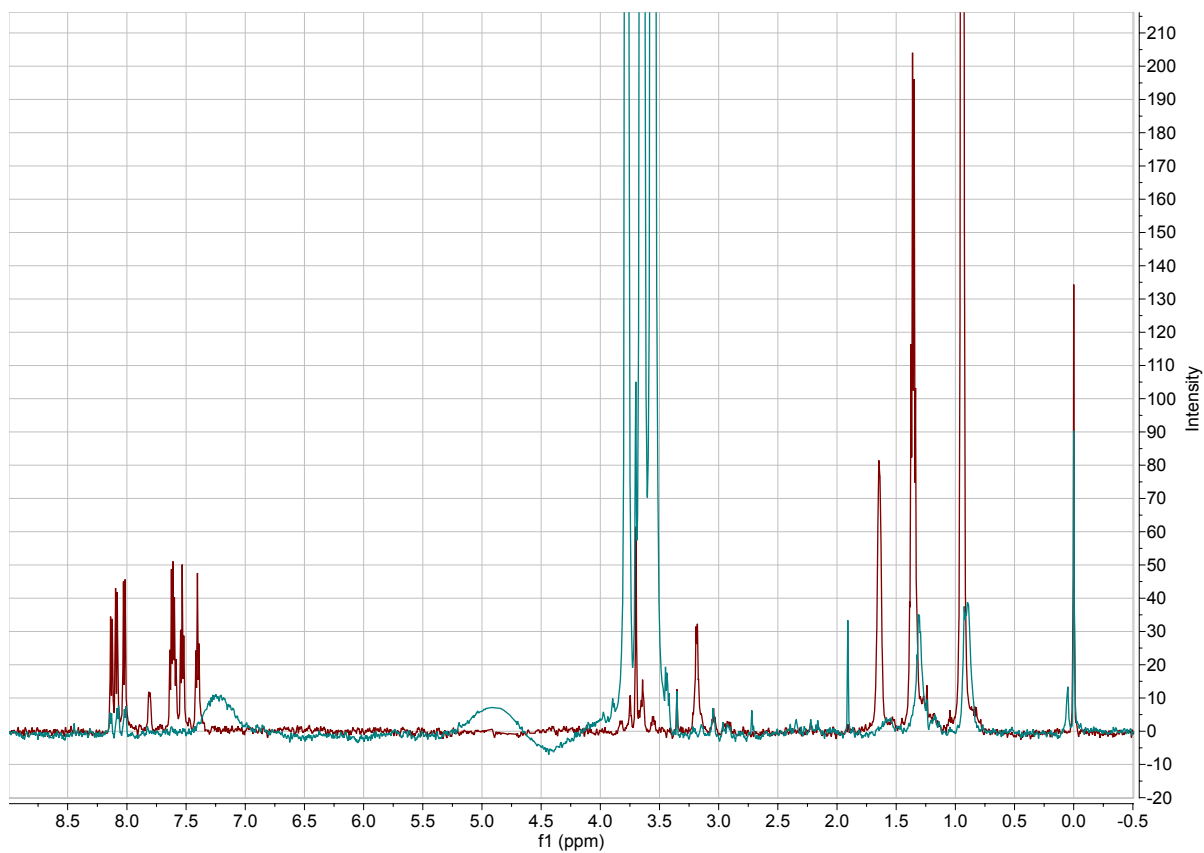

Figure S25 – Overlaid 1D  $^1\text{H}$  CPMG NMR spectrum of **1** at 0.10 mM only (red) and **1** in the presence of one molar equivalent *E. coli* SMA nanodiscs (green) in sodium phosphate buffer (20 mM) with 20 mM sodium chloride at pH 7.4, supplemented with 5%  $\text{D}_2\text{O}$  and 0.01 mM DSS.

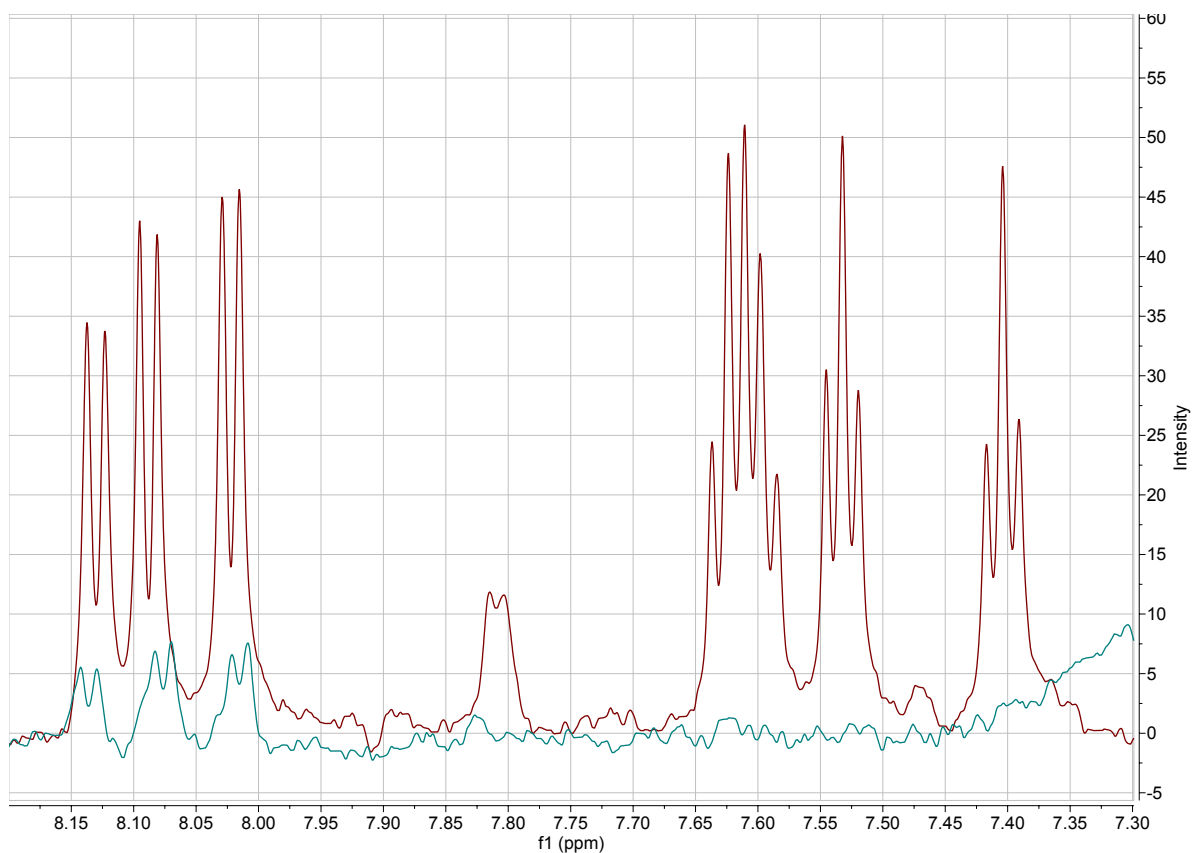

Figure S26 – Overlaid aromatic region of the 1D  $^1\text{H}$  CPMG NMR spectrum of **1** at 0.10 mM only (red) and **1** in the presence of one molar equivalent of *E. coli* SMA nanodiscs (green) in sodium phosphate buffer (20 mM) with 20 mM sodium chloride at pH 7.4, supplemented with 5%  $\text{D}_2\text{O}$  and 0.01 mM DSS.

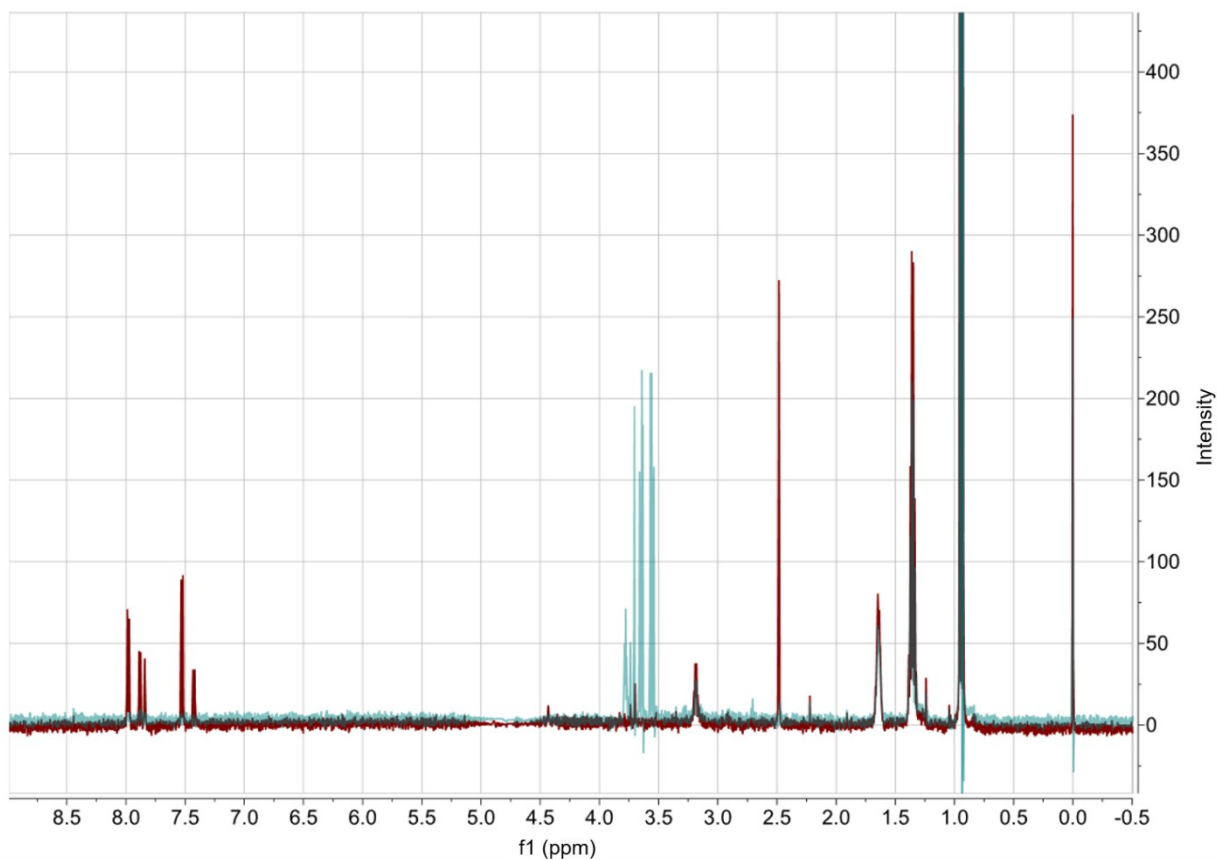

Figure S27 – Overlaid 1D <sup>1</sup>H CPMG NMR spectrum of **2** at 0.10 mM only (red) and **2** in the presence of 0.031 molar equivalents of DMPC SMA nanodiscs (green) in sodium phosphate buffer (20 mM) with 20 mM sodium chloride at pH 7.4, supplemented with 5% D<sub>2</sub>O and 0.01 mM DSS.

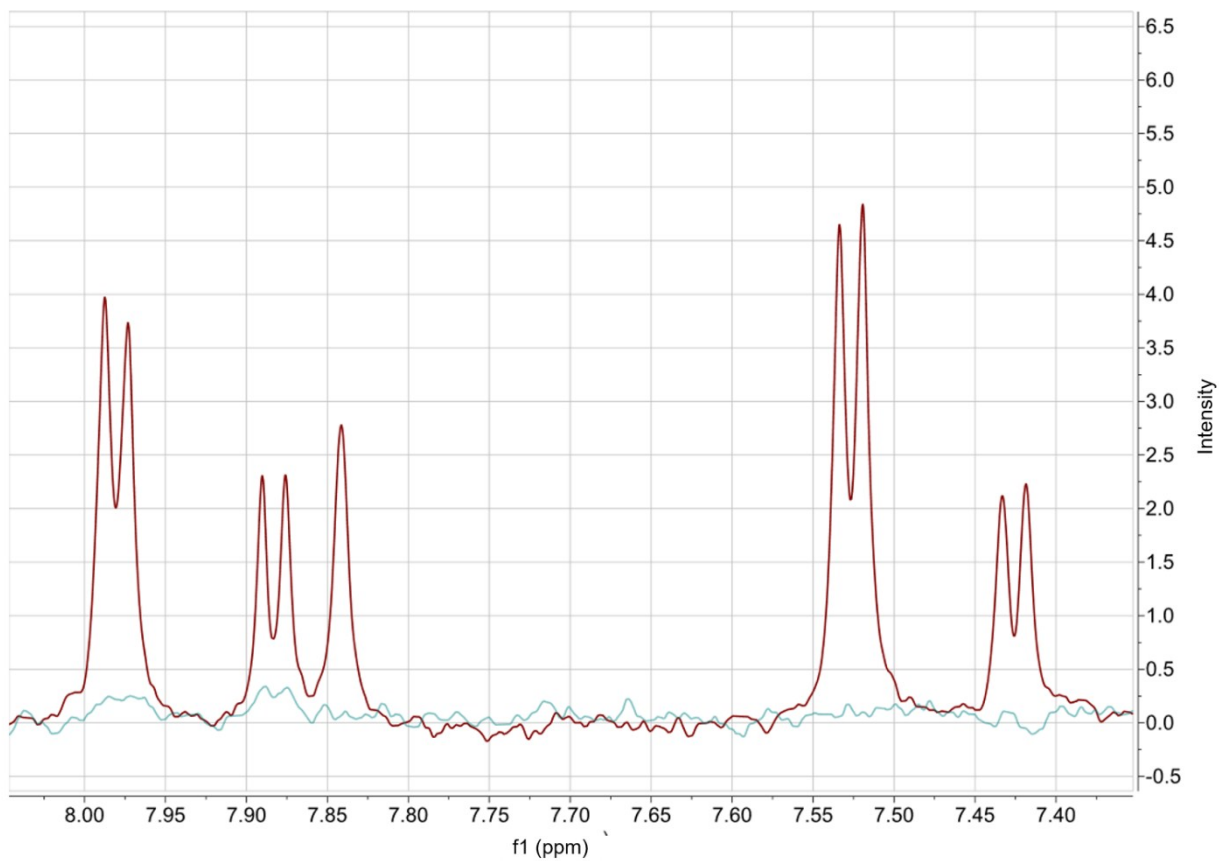

Figure S28 – Overlaid aromatic region of the 1D  $^1\text{H}$  CPMG NMR spectrum of **2** at 0.10 mM only (red) and **2** in the presence of 0.031 molar equivalents of DMPC SMA nanodiscs (green) in sodium phosphate buffer (20 mM) with 20 mM sodium chloride at pH 7.4, supplemented with 5%  $\text{D}_2\text{O}$  and 0.01 mM DSS.

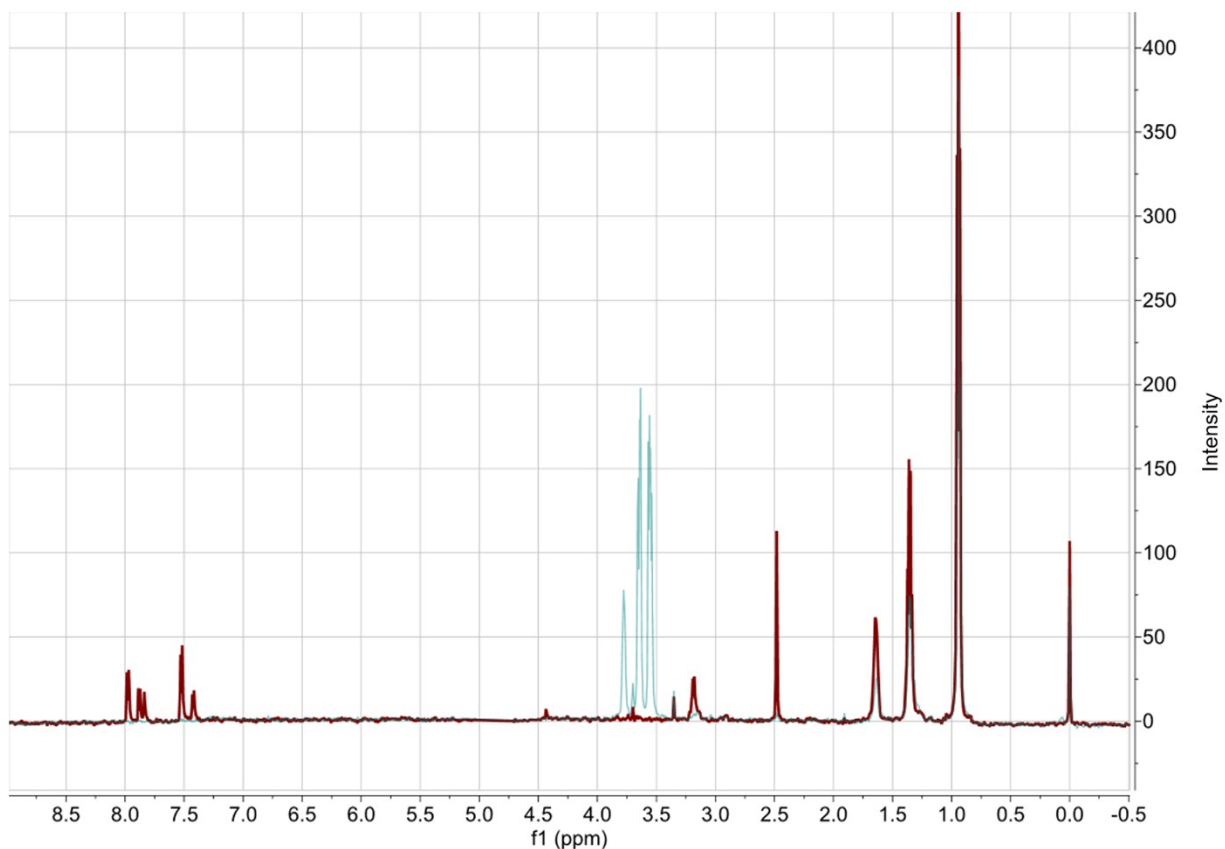

Figure S29 – Overlaid 1D <sup>1</sup>H CPMG NMR spectrum of **2** at 0.10 mM only (red) and **2** in the presence of 0.031 molar equivalents of *E. coli* SMA nanodiscs (green) in sodium phosphate buffer (20 mM) with 20 mM sodium chloride at pH 7.4, supplemented with 5% D<sub>2</sub>O and 0.01 mM DSS.

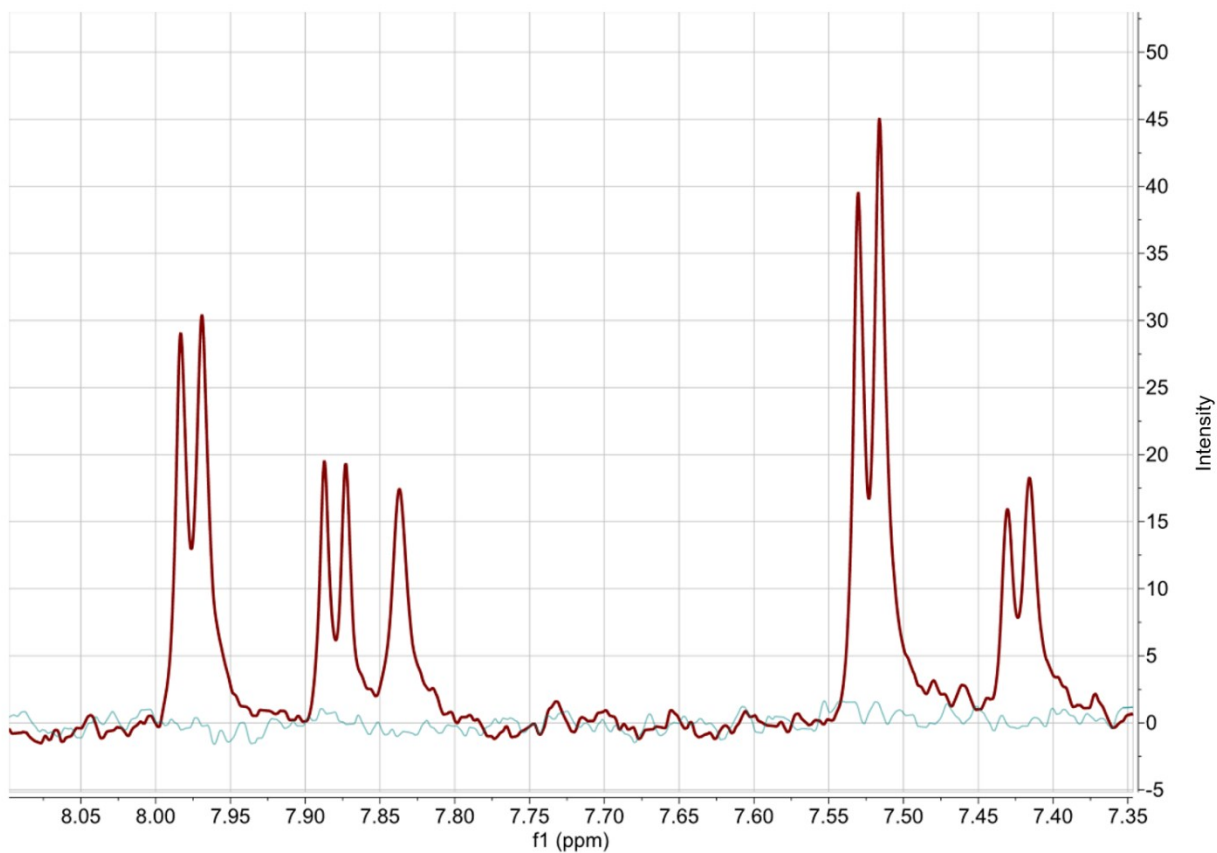

Figure S30 – Overlaid aromatic region of the 1D  $^1\text{H}$  CPMG NMR spectrum of **2** at 0.10 mM only (red) and **2** in the presence of 0.031 molar equivalents of *E. coli* SMA nanodiscs (green) in sodium phosphate buffer (20 mM) with 20 mM sodium chloride at pH 7.4, supplemented with 5%  $\text{D}_2\text{O}$  and 0.01 mM DSS.

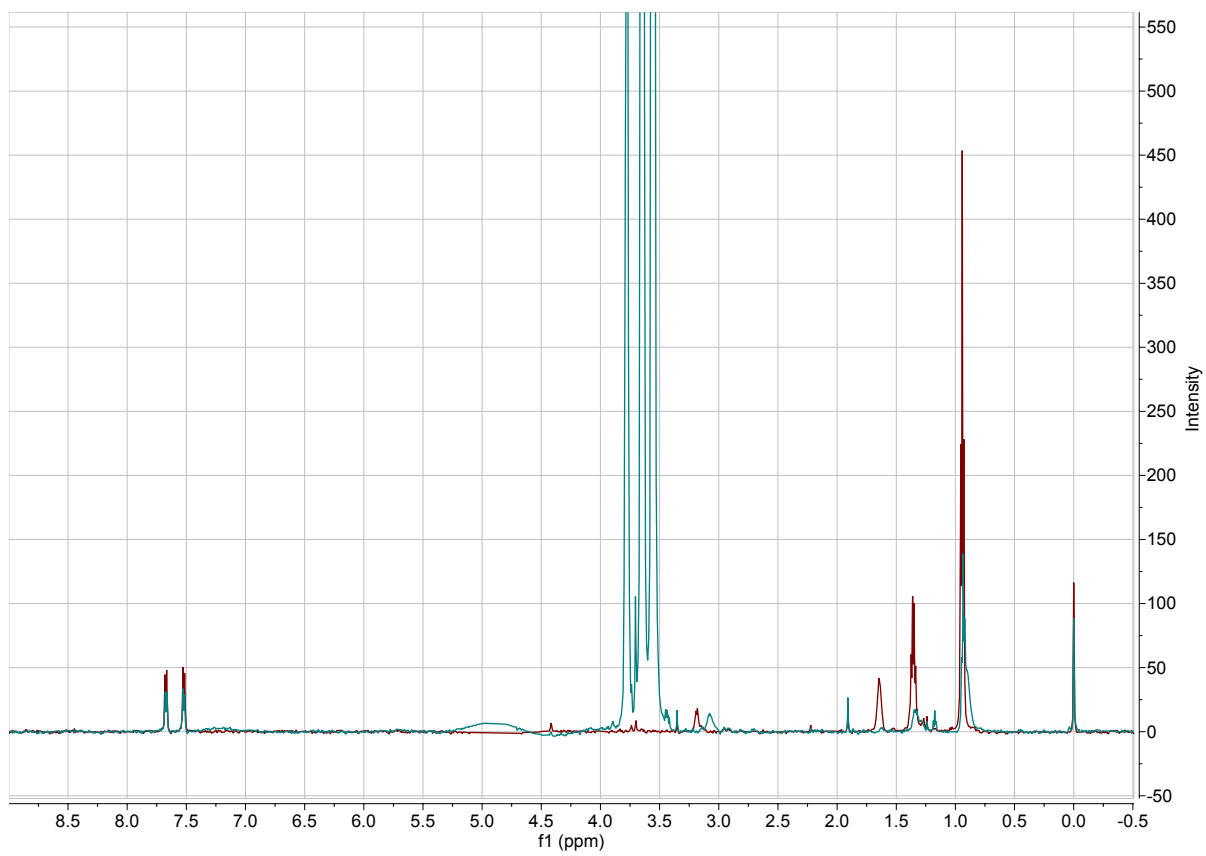

Figure S31 – Overlaid 1D  $^1\text{H}$  CPMG NMR spectrum of **3** at 0.10 mM only (red) and **3** in the presence of 1.2 molar equivalents of DMPC SMA nanodiscs (green) in sodium phosphate buffer (20 mM) with 20 mM sodium chloride at pH 7.4, supplemented with 5%  $\text{D}_2\text{O}$  and 0.01 mM DSS.

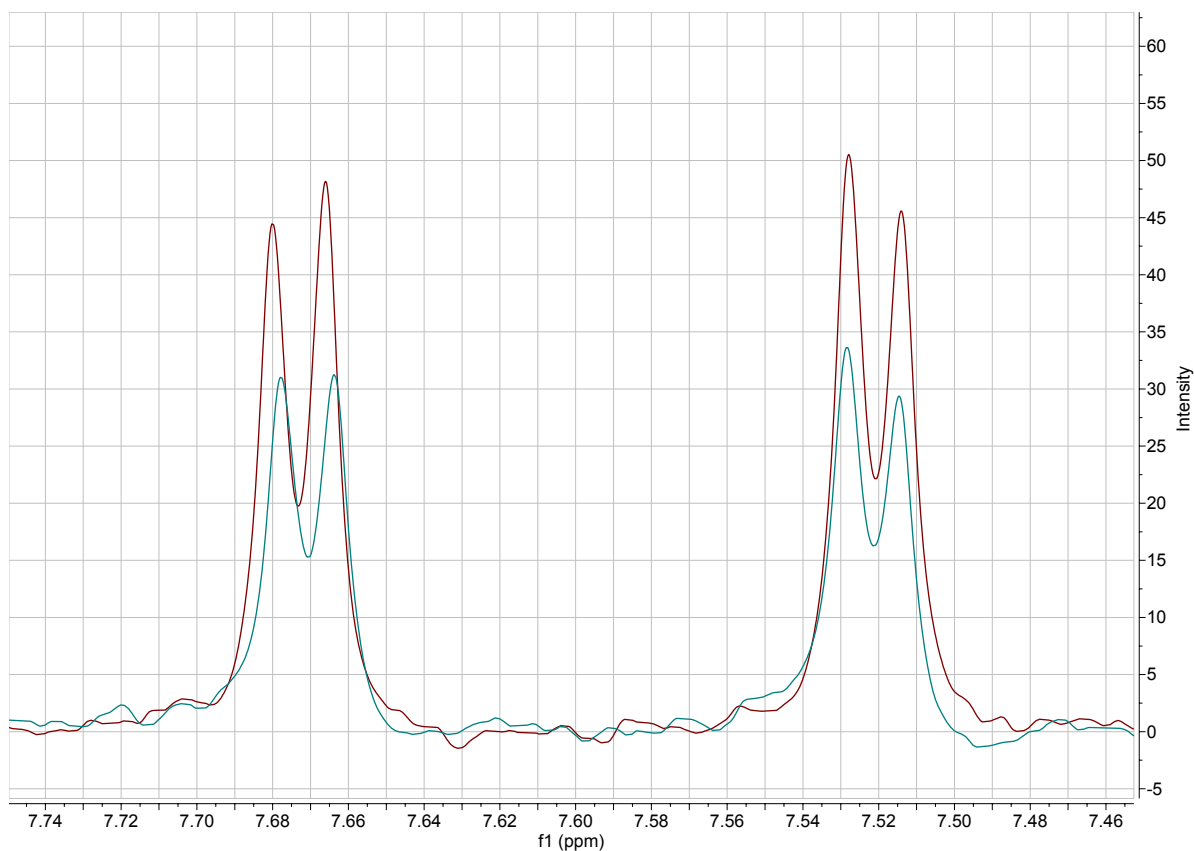

Figure S32 – Overlaid aromatic region of the 1D  $^1\text{H}$  CPMG NMR spectrum of **3** at 0.10 mM free (red) and **3** in the presence of 1.2 molar equivalent of DMPC SMA nanodiscs (green) in sodium phosphate buffer (20 mM) with 20 mM sodium chloride at pH 7.4, supplemented with 5%  $\text{D}_2\text{O}$  and 0.01 mM DSS.

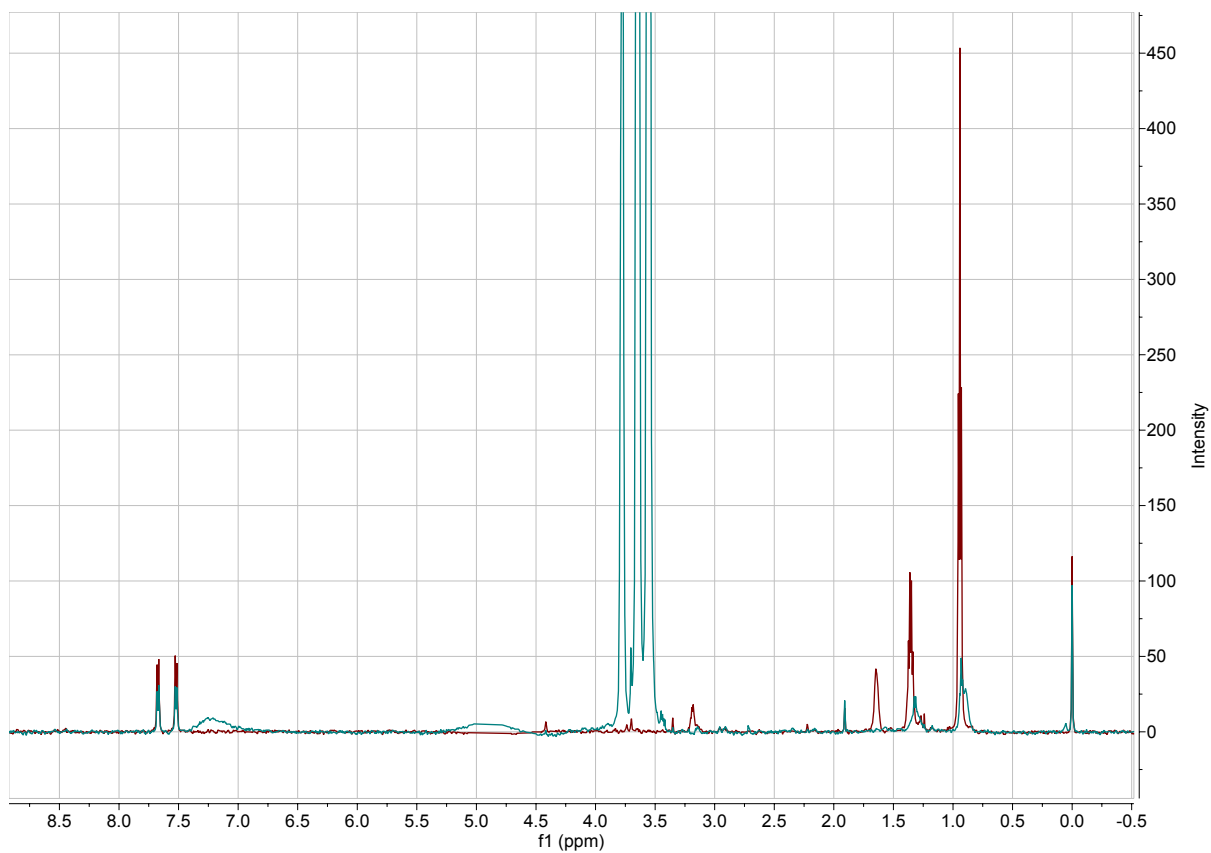

Figure S33 – Overlaid 1D  $^1\text{H}$  CPMG NMR spectrum of **3** at 0.10 mM only (red) and **3** in the presence of 1.2 molar equivalents of *E. coli* SMA nanodiscs (green) in sodium phosphate buffer (20 mM) with 20 mM sodium chloride at pH 7.4, supplemented with 5%  $\text{D}_2\text{O}$  and 0.01 mM DSS.

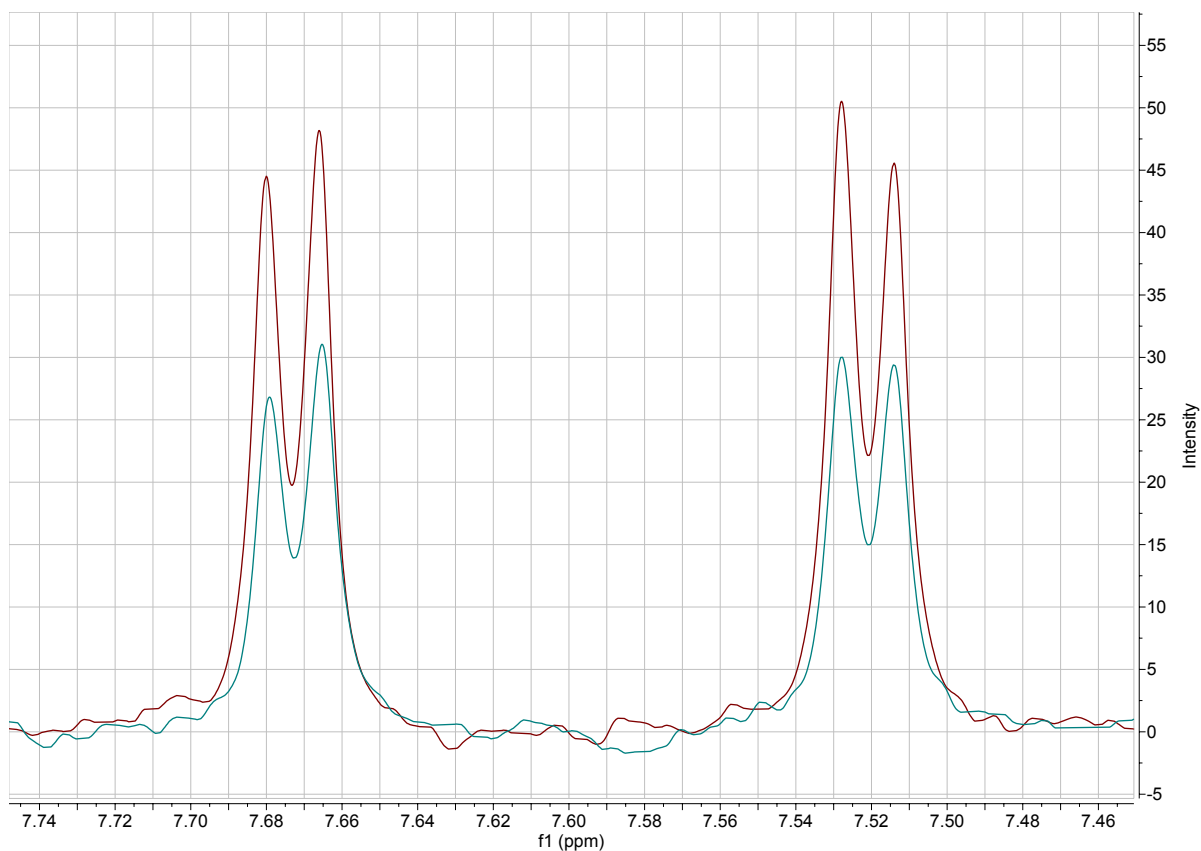

Figure S34 – Overlaid aromatic region of the 1D <sup>1</sup>H CPMG NMR spectrum of **3** at 0.10 mM only (red) and **3** in the presence of 1.2 molar equivalents of *E. coli* SMA nanodiscs (green) in sodium phosphate buffer (20 mM) with 20 mM sodium chloride at pH 7.4, supplemented with 5% D<sub>2</sub>O and 0.01 mM DSS.

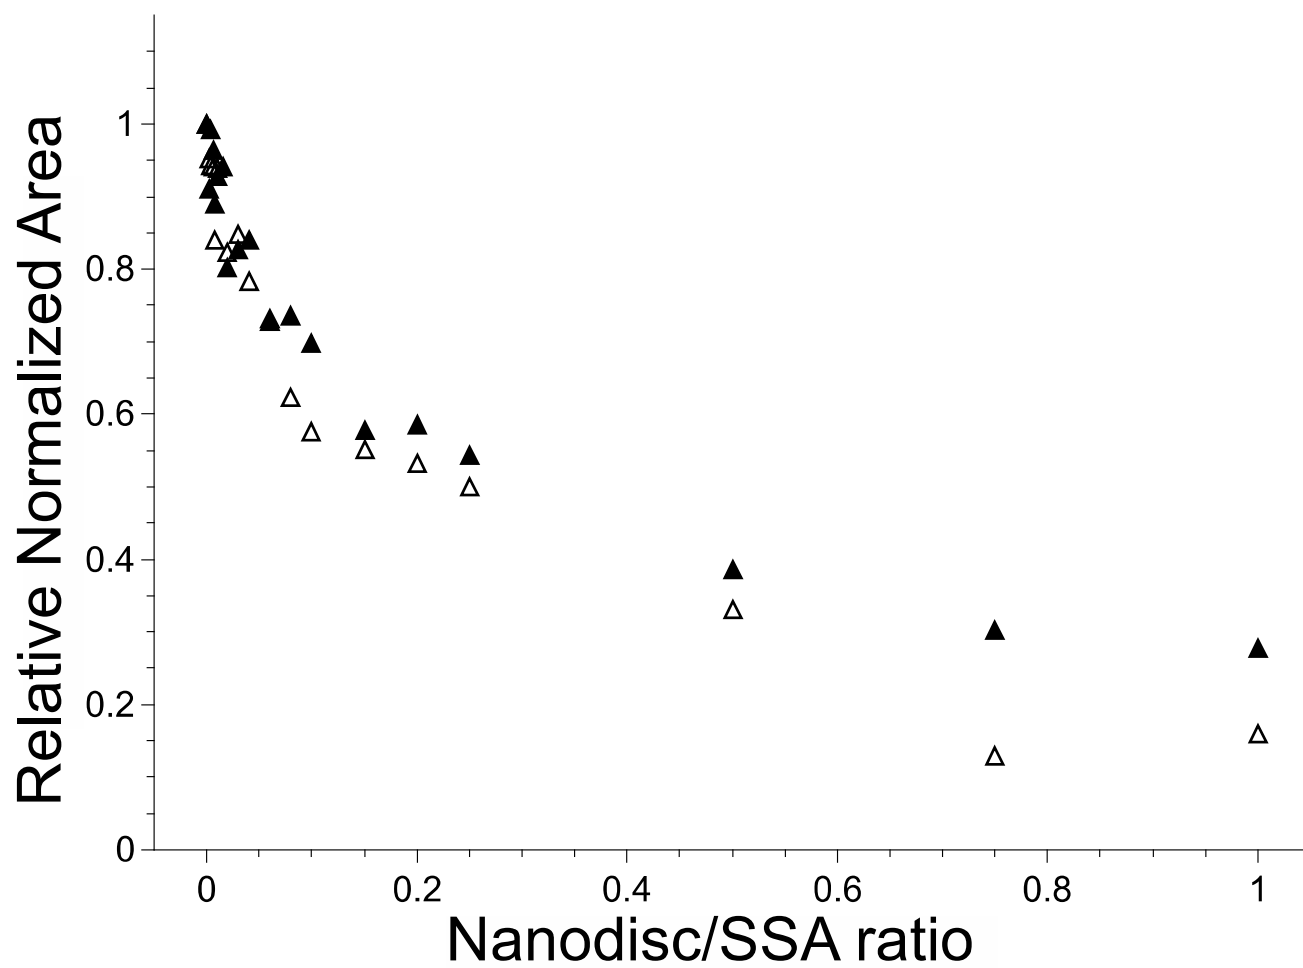

Figure S35 – The relative normalized area of the most downfield aromatic SSA resonance of **1** with *E. coli* lipid (open symbols) and DMPC (filled symbols) nanodiscs.

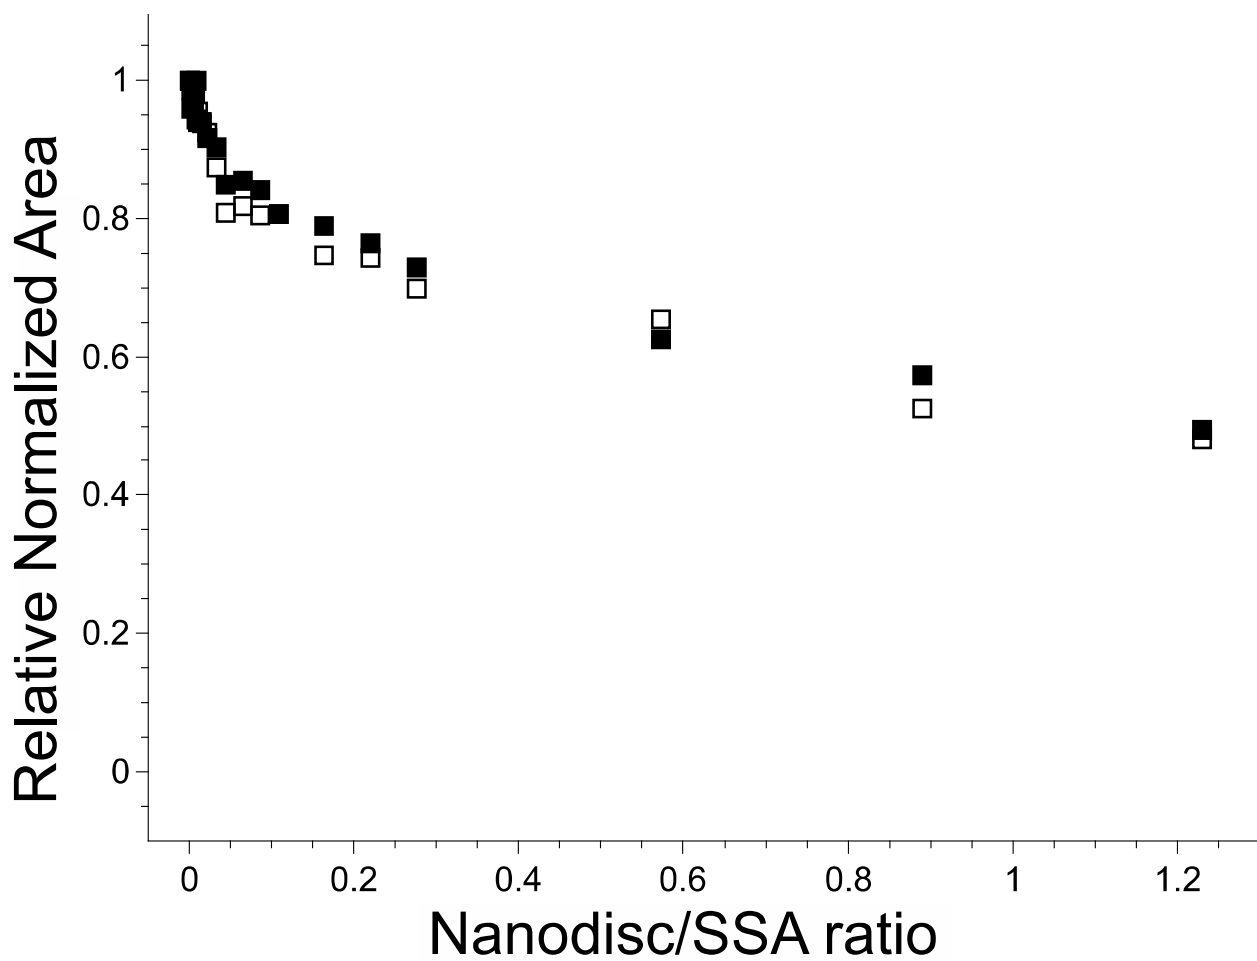

Figure S36 – The relative normalized area of the most downfield aromatic SSA resonance of **3** with *E. coli* lipid (open symbols) and DMPC (filled symbols) nanodiscs.

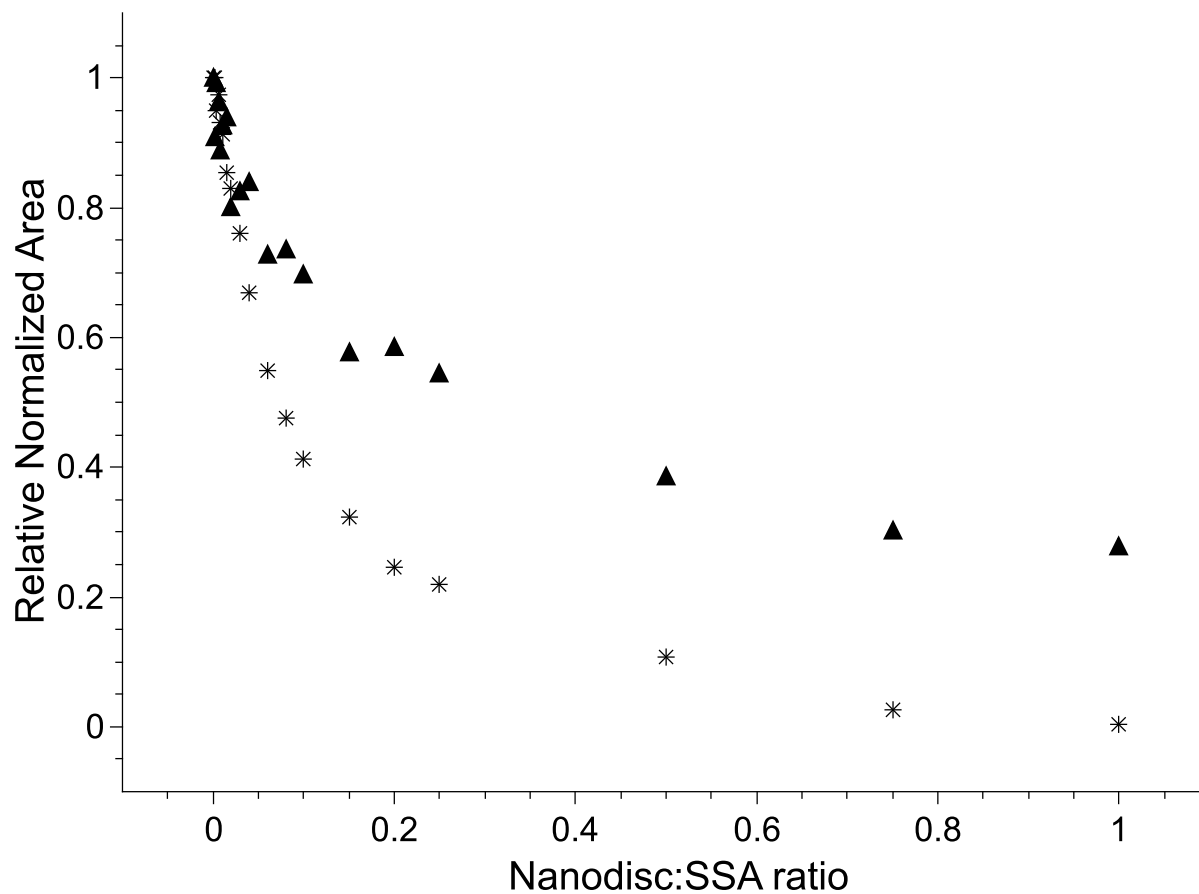

Figure S37 – The relative normalized area of the most downfield aromatic SSA resonance of **1** (filled triangles) and its associated TBA cation (stars) upon titration with DMPC nanodiscs.

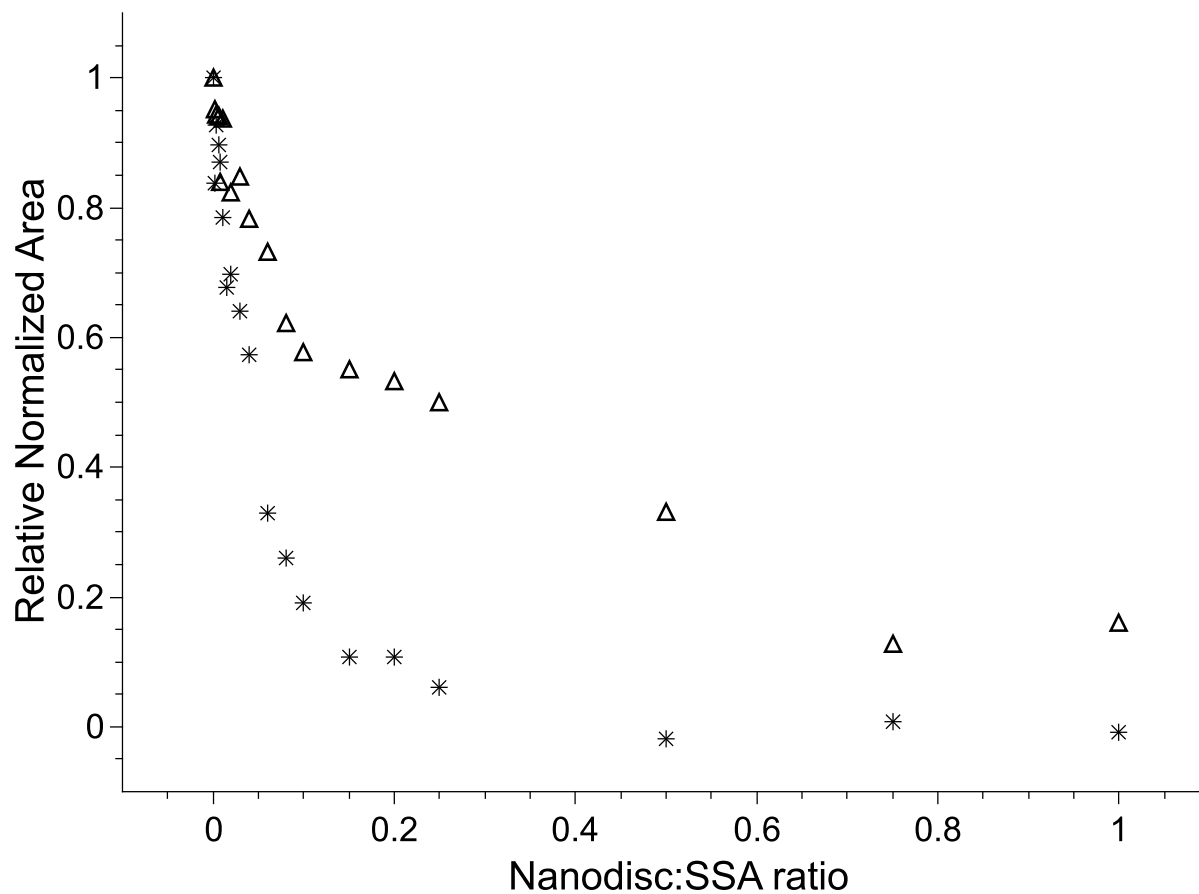

Figure S38 – The relative normalized area of the most downfield aromatic SSA resonance of **1** (open triangles) and its associated TBA cation (stars) upon titration with *E. coli* nanodiscs.

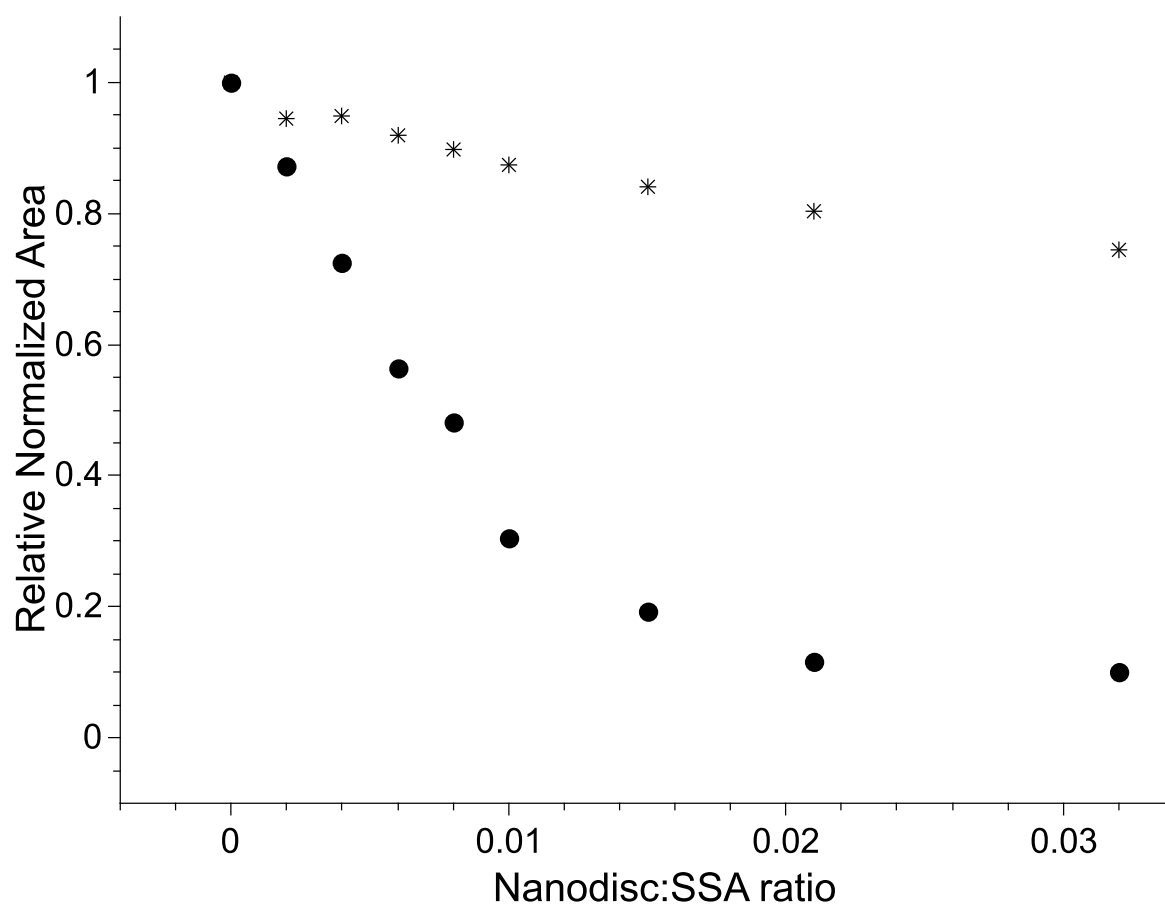

Figure S39 – The relative normalized area of the most downfield aromatic SSA resonance of **2** (filled circles) and its associated TBA cation (stars) upon titration with DMPC nanodiscs.

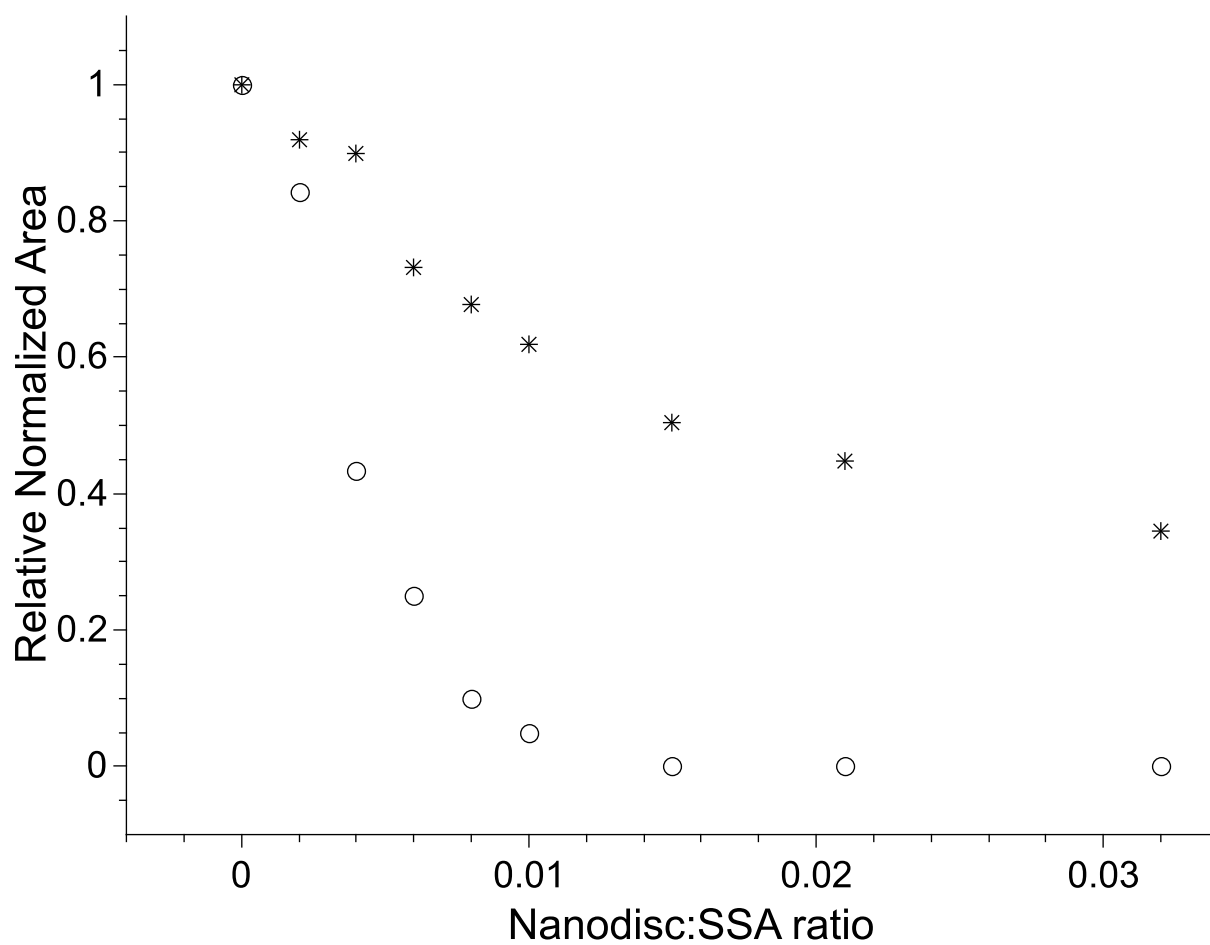

Figure S40 – The relative normalized area of the most downfield aromatic SSA resonance of **2** (open circles) and its associated TBA cation (stars) upon titration with *E. coli* nanodiscs.

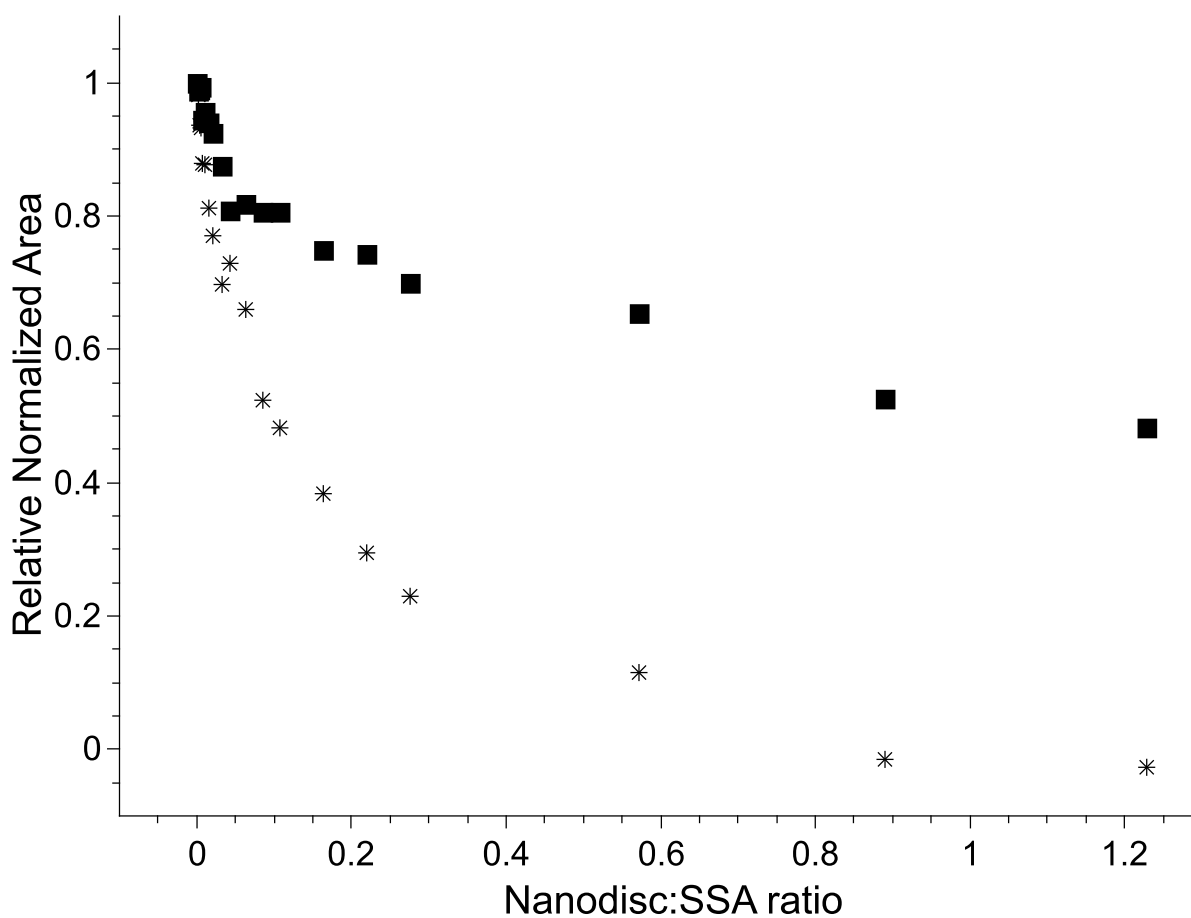

Figure S41 – The relative normalized area of the most downfield aromatic SSA resonance of **3** (filled squares) and its associated TBA cation (stars) upon titration with DMPC nanodiscs.

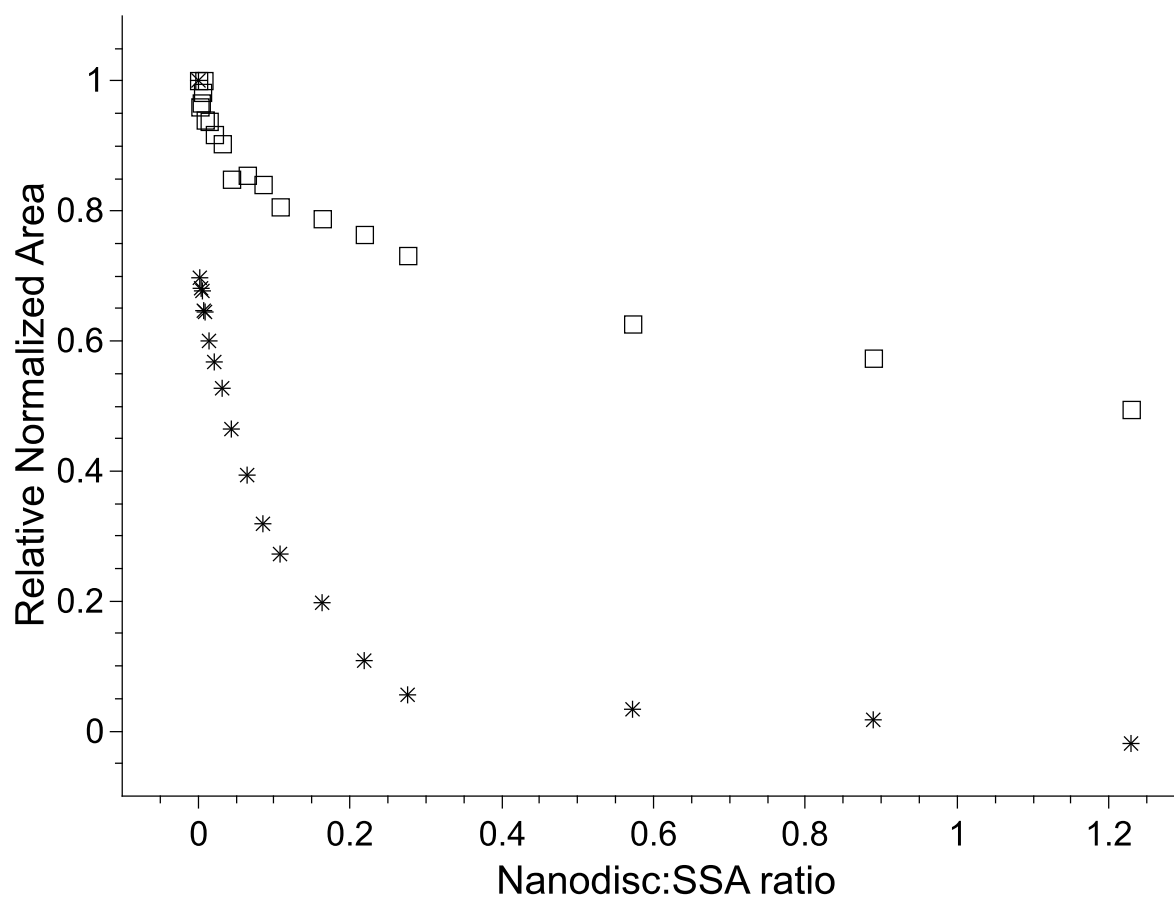

Figure S42 – The relative normalized area of the most downfield aromatic SSA resonance of **3** (open squares) and its associated TBA cation (stars) upon titration with *E. coli* nanodiscs.

## References

1. L. J. White, N. J. Wells, L. R. Blackholly, H. J. Shepherd, B. Wilson, G. P. Bustone, T. J. Runacres and J. R. Hiscock, *Chem. Sci.*, 2017, **8**, 7620-7630.
2. J. R. Hiscock, G. P. Bustone, B. Wilson, K. E. Belsey and L. R. Blackholly, *Soft Matter*, 2016, **12**, 4221-4228.
3. H. Y. Carr and E. M. Purcell, *Phys. Rev.* , 1954, **94**, 630–638.
4. S. Meiboom and D. Gill, *Rev. Sci. Instrum.*, 1958, **29**, 688–691.
